# Supplementary material for: Dissecting the causal relationship between moderate to vigorous physical activity levels and cognitive performance: a bidirectional two-sample Mendelian randomization study
Source: Front Psychol. 2024 Sep 6;15:1368241. doi: 10.3389/fpsyg.2024.1368241 (PMC11412864; doi:10.3389/fpsyg.2024.1368241)
Supplement: Supplementary file 2 [file Table_2.XLSX]

## Sheet: Index
	Supplementary Table
INDEX	Title
Table S1	Details of the data sources used in this study
Table S2	Instrumental variables for MVPA (significant level of P < 5e-08)
Table S3	The strength of Instrumental variables for MVPA (significant level of P < 5e-08)
Table S4	Instrumental variables for cognitive performance (significant level of P < 5e-08)
Table S5	The strength of Instrumental variables for cognitive performance (significant level of P < 5e-08)

## Sheet: Table S1
Table S1 Details of the data sources used in this study
Note: *The detail information of Moderate to vigorous physical activity levels(MVPA） was showed in https://gwas.mrcieu.ac.uk/datasets/ebi-a-GCST006097/. ** The detail information of types of cognitive performance was showed in https://gwas.mrcieu.ac.uk/datasets/ebi-a-GCST006572/.
Exposure or Outcome	PMID	Ancestry	Consortium	Participants	Source (accessed on 31 Dec. 2023)
Moderate to vigorous physical activity levels	29899525	European	NA	377234	https://gwas.mrcieu.ac.uk/datasets/ebi-a-GCST006097/
cognitive performance	30038396	European	NA	257841	https://gwas.mrcieu.ac.uk/datasets/ebi-a-GCST006572/

## Sheet: Table S2
Table S2 Instrumental variables for MVPA (significant level of P < 5e-08)
Note: *EAF：effect allele frequency; SE: standard error; SNP, single nucleotide polymorphism;
	SNP	effect_allele.exposure	other_allele.exposure	effect_allele.outcome	other_allele.outcome	beta.exposure	beta.outcome	eaf.exposure	eaf.outcome	remove	palindromic	ambiguous	id.outcome	chr	pos	se.outcome	samplesize.outcome	pval.outcome	outcome	originalname.outcome	outcome.deprecated	mr_keep.outcome	data_source.outcome	proxy.outcome	target_snp.outcome	proxy_snp.outcome	target_a1.outcome	target_a2.outcome	proxy_a1.outcome	proxy_a2.outcome	pos.exposure	samplesize.exposure	pval.exposure	chr.exposure	se.exposure	id.exposure	exposure	mr_keep.exposure	pval_origin.exposure	data_source.exposure	action	SNP_index	mr_keep
1	rs10145335	A	G	A	G	0.0141221	-0.01973	0.250611	0.2619	FALSE	FALSE	FALSE	ebi-a-GCST006572	14	98547748	0.00329	257841	2.10999e-09	Cognitive performance || id:ebi-a-GCST006572	Cognitive performance	Cognitive performance || ||	TRUE	igd	#N/A	#N/A	#N/A	#N/A	#N/A	#N/A	#N/A	98547748	377234	2.69998e-08	14	0.00254139	ebi-a-GCST006097	Moderate to vigorous physical activity levels || id:ebi-a-GCST006097	TRUE	reported	igd	2	1	TRUE
2	rs1043595	A	G	A	G	-0.014411	0.02097	0.282865	0.2857	FALSE	FALSE	FALSE	ebi-a-GCST006572	7	128410012	0.00317	257841	3.67959e-11	Cognitive performance || id:ebi-a-GCST006572	Cognitive performance	Cognitive performance || ||	TRUE	igd	#N/A	#N/A	#N/A	#N/A	#N/A	#N/A	#N/A	128410012	377234	4.30002e-09	7	0.00245416	ebi-a-GCST006097	Moderate to vigorous physical activity levels || id:ebi-a-GCST006097	TRUE	reported	igd	2	1	TRUE
3	rs1186721	A	G	A	G	0.01299	-0.00192	0.315844	0.284	FALSE	FALSE	FALSE	ebi-a-GCST006572	7	34974602	0.00307	257841	0.53	Cognitive performance || id:ebi-a-GCST006572	Cognitive performance	Cognitive performance || ||	TRUE	igd	#N/A	#N/A	#N/A	#N/A	#N/A	#N/A	#N/A	34974602	377234	4.39997e-08	7	0.00237226	ebi-a-GCST006097	Moderate to vigorous physical activity levels || id:ebi-a-GCST006097	TRUE	reported	igd	2	1	TRUE
4	rs12912808	T	C	T	C	-0.017546	0.00712	0.148607	0.1276	FALSE	FALSE	FALSE	ebi-a-GCST006572	15	95292223	0.00402	257841	0.0763994	Cognitive performance || id:ebi-a-GCST006572	Cognitive performance	Cognitive performance || ||	TRUE	igd	#N/A	#N/A	#N/A	#N/A	#N/A	#N/A	#N/A	95292223	377234	1.7e-08	15	0.00310889	ebi-a-GCST006097	Moderate to vigorous physical activity levels || id:ebi-a-GCST006097	TRUE	reported	igd	2	1	TRUE
5	rs1921981	A	G	A	G	-0.013037	0.00439	0.325647	0.301	FALSE	FALSE	FALSE	ebi-a-GCST006572	21	42422547	0.00305	257841	0.151	Cognitive performance || id:ebi-a-GCST006572	Cognitive performance	Cognitive performance || ||	TRUE	igd	#N/A	#N/A	#N/A	#N/A	#N/A	#N/A	#N/A	42422547	377234	3.79997e-08	21	0.00237139	ebi-a-GCST006097	Moderate to vigorous physical activity levels || id:ebi-a-GCST006097	TRUE	reported	igd	2	1	TRUE
6	rs1972763	T	C	T	C	-0.0128383	0.01053	0.657628	0.6412	FALSE	FALSE	FALSE	ebi-a-GCST006572	4	159860563	0.003	257841	0.000455995	Cognitive performance || id:ebi-a-GCST006572	Cognitive performance	Cognitive performance || ||	TRUE	igd	#N/A	#N/A	#N/A	#N/A	#N/A	#N/A	#N/A	159860563	377234	3.29997e-08	4	0.00232366	ebi-a-GCST006097	Moderate to vigorous physical activity levels || id:ebi-a-GCST006097	TRUE	reported	igd	2	1	TRUE
7	rs1974771	A	G	A	G	0.0213389	0.00484	0.099975	0.1173	FALSE	FALSE	FALSE	ebi-a-GCST006572	2	54278543	0.00473	257841	0.306	Cognitive performance || id:ebi-a-GCST006572	Cognitive performance	Cognitive performance || ||	TRUE	igd	#N/A	#N/A	#N/A	#N/A	#N/A	#N/A	#N/A	54278543	377234	6.59994e-09	2	0.00367836	ebi-a-GCST006097	Moderate to vigorous physical activity levels || id:ebi-a-GCST006097	TRUE	reported	igd	2	1	TRUE
8	rs2035562	G	A	G	A	0.0138763	-0.00827	0.672483	0.7075	FALSE	FALSE	FALSE	ebi-a-GCST006572	3	85056521	0.00304	257841	0.00648993	Cognitive performance || id:ebi-a-GCST006572	Cognitive performance	Cognitive performance || ||	TRUE	igd	#N/A	#N/A	#N/A	#N/A	#N/A	#N/A	#N/A	85056521	377234	3.89996e-09	3	0.00235606	ebi-a-GCST006097	Moderate to vigorous physical activity levels || id:ebi-a-GCST006097	TRUE	reported	igd	2	1	TRUE
9	rs2114286	G	A	G	A	0.0122453	-0.01167	0.534243	0.5408	FALSE	FALSE	FALSE	ebi-a-GCST006572	3	41194283	0.00287	257841	4.70999e-05	Cognitive performance || id:ebi-a-GCST006572	Cognitive performance	Cognitive performance || ||	TRUE	igd	#N/A	#N/A	#N/A	#N/A	#N/A	#N/A	#N/A	41194283	377234	3.29997e-08	3	0.00221725	ebi-a-GCST006097	Moderate to vigorous physical activity levels || id:ebi-a-GCST006097	TRUE	reported	igd	2	1	TRUE
10	rs2854277	T	C	T	C	-0.0320288	0.02035	0.082571	0.1156	FALSE	FALSE	FALSE	ebi-a-GCST006572	6	32628428	0.0041	257841	6.89001e-07	Cognitive performance || id:ebi-a-GCST006572	Cognitive performance	Cognitive performance || ||	TRUE	igd	TRUE	rs2854277	rs2854275	T	C	A	C	32628084	377234	2.59998e-10	6	0.00506676	ebi-a-GCST006097	Moderate to vigorous physical activity levels || id:ebi-a-GCST006097	TRUE	reported	igd	2	1	TRUE
11	rs2942127	A	G	A	G	-0.016037	-0.00569	0.824644	0.7959	FALSE	FALSE	FALSE	ebi-a-GCST006572	1	204420067	0.00374	257841	0.128	Cognitive performance || id:ebi-a-GCST006572	Cognitive performance	Cognitive performance || ||	TRUE	igd	#N/A	#N/A	#N/A	#N/A	#N/A	#N/A	#N/A	204420067	377234	3.29997e-08	1	0.00290278	ebi-a-GCST006097	Moderate to vigorous physical activity levels || id:ebi-a-GCST006097	TRUE	reported	igd	2	1	TRUE
12	rs2988004	G	T	G	T	0.0131708	-0.00192	0.442245	0.449	FALSE	FALSE	FALSE	ebi-a-GCST006572	9	37044388	0.00288	257841	0.505	Cognitive performance || id:ebi-a-GCST006572	Cognitive performance	Cognitive performance || ||	TRUE	igd	#N/A	#N/A	#N/A	#N/A	#N/A	#N/A	#N/A	37044388	377234	4.09996e-09	9	0.00223979	ebi-a-GCST006097	Moderate to vigorous physical activity levels || id:ebi-a-GCST006097	TRUE	reported	igd	2	1	TRUE
13	rs429358	C	T	C	T	0.0219822	-0.01665	0.154172	0.165	FALSE	FALSE	FALSE	ebi-a-GCST006572	19	45411941	0.00399	257841	3.03997e-05	Cognitive performance || id:ebi-a-GCST006572	Cognitive performance	Cognitive performance || ||	TRUE	igd	#N/A	#N/A	#N/A	#N/A	#N/A	#N/A	#N/A	45411941	377234	6.09958e-13	19	0.00305356	ebi-a-GCST006097	Moderate to vigorous physical activity levels || id:ebi-a-GCST006097	TRUE	reported	igd	2	1	TRUE
14	rs4886868	G	T	G	T	0.0124954	-0.00886	0.585862	0.5969	FALSE	FALSE	FALSE	ebi-a-GCST006572	15	74353561	0.00293	257841	0.00249	Cognitive performance || id:ebi-a-GCST006572	Cognitive performance	Cognitive performance || ||	TRUE	igd	#N/A	#N/A	#N/A	#N/A	#N/A	#N/A	#N/A	74353561	377234	3.50002e-08	15	0.00226611	ebi-a-GCST006097	Moderate to vigorous physical activity levels || id:ebi-a-GCST006097	TRUE	reported	igd	2	1	TRUE
15	rs7326482	T	G	T	G	0.0129605	-0.00587	0.615163	0.6429	FALSE	FALSE	FALSE	ebi-a-GCST006572	13	54037803	0.00293	257841	0.0449997	Cognitive performance || id:ebi-a-GCST006572	Cognitive performance	Cognitive performance || ||	TRUE	igd	#N/A	#N/A	#N/A	#N/A	#N/A	#N/A	#N/A	54037803	377234	1.6e-08	13	0.00229416	ebi-a-GCST006097	Moderate to vigorous physical activity levels || id:ebi-a-GCST006097	TRUE	reported	igd	2	1	TRUE
16	rs77742115	C	T	C	T	0.018348	-0.00311	0.138319	0.1395	FALSE	FALSE	FALSE	ebi-a-GCST006572	5	18330424	0.0041	257841	0.448	Cognitive performance || id:ebi-a-GCST006572	Cognitive performance	Cognitive performance || ||	TRUE	igd	#N/A	#N/A	#N/A	#N/A	#N/A	#N/A	#N/A	18330424	377234	9.59997e-09	5	0.00319777	ebi-a-GCST006097	Moderate to vigorous physical activity levels || id:ebi-a-GCST006097	TRUE	reported	igd	2	1	TRUE
17	rs7804463	C	T	C	T	-0.0150095	0.02004	0.470424	0.4711	FALSE	FALSE	FALSE	ebi-a-GCST006572	7	133447651	0.00286	257841	2.25996e-12	Cognitive performance || id:ebi-a-GCST006572	Cognitive performance	Cognitive performance || ||	TRUE	igd	#N/A	#N/A	#N/A	#N/A	#N/A	#N/A	#N/A	133447651	377234	1.20005e-11	7	0.00221333	ebi-a-GCST006097	Moderate to vigorous physical activity levels || id:ebi-a-GCST006097	TRUE	reported	igd	2	1	TRUE
18	rs877483	C	T	C	T	-0.0122277	0.00463	0.566815	0.5629	FALSE	FALSE	FALSE	ebi-a-GCST006572	3	53846741	0.00289	257841	0.109	Cognitive performance || id:ebi-a-GCST006572	Cognitive performance	Cognitive performance || ||	TRUE	igd	#N/A	#N/A	#N/A	#N/A	#N/A	#N/A	#N/A	53846741	377234	4e-08	3	0.00222756	ebi-a-GCST006097	Moderate to vigorous physical activity levels || id:ebi-a-GCST006097	TRUE	reported	igd	2	1	TRUE
19	rs921915	C	T	C	T	0.0138882	0.00203	0.587905	0.5918	FALSE	FALSE	FALSE	ebi-a-GCST006572	7	50228581	0.0029	257841	0.483	Cognitive performance || id:ebi-a-GCST006572	Cognitive performance	Cognitive performance || ||	TRUE	igd	#N/A	#N/A	#N/A	#N/A	#N/A	#N/A	#N/A	50228581	377234	5.69994e-10	7	0.00224013	ebi-a-GCST006097	Moderate to vigorous physical activity levels || id:ebi-a-GCST006097	TRUE	reported	igd	2	1	TRUE

## Sheet: Table S3
Table S3 The strength of Instrumental variables for MVPA (significant level of P < 5e-08)
Note: *EAF：effect allele frequency; SE: standard error; SNP, single nucleotide polymorphism;
	SNP	EAF	beta	SE	N	R2	F
1	rs10145335	0.250611	0.0141221	0.00254139	377234	8.18483e-05	30.8783
2	rs1043595	0.282865	-0.014411	0.00245416	377234	9.1397e-05	34.481
3	rs1186721	0.315844	0.01299	0.00237226	377234	7.94783e-05	29.9841
4	rs12912808	0.148607	-0.017546	0.00310889	377234	8.44302e-05	31.8525
5	rs1921981	0.325647	-0.013037	0.00237139	377234	8.01131e-05	30.2237
6	rs1972763	0.657628	-0.0128383	0.00232366	377234	8.0914e-05	30.5258
7	rs1974771	0.099975	0.0213389	0.00367836	377234	8.92043e-05	33.6537
8	rs2035562	0.672483	0.0138763	0.00235606	377234	9.19441e-05	34.6874
9	rs2114286	0.534243	0.0122453	0.00221725	377234	8.08469e-05	30.5005
10	rs2854277	0.082571	-0.0320288	0.00506676	377234	0.000105917	39.9593
11	rs2942127	0.824644	-0.016037	0.00290278	377234	8.09044e-05	30.5222
12	rs2988004	0.442245	0.0131708	0.00223979	377234	9.16556e-05	34.5786
13	rs429358	0.154172	0.0219822	0.00305356	377234	0.00013736	51.8235
14	rs4886868	0.585862	0.0124954	0.00226611	377234	8.05921e-05	30.4044
15	rs7326482	0.615163	0.0129605	0.00229416	377234	8.45957e-05	31.9149
16	rs77742115	0.138319	0.018348	0.00319777	377234	8.72638e-05	32.9216
17	rs7804463	0.470424	-0.0150095	0.00221333	377234	0.000121892	45.9873
18	rs877483	0.566815	-0.0122277	0.00222756	377234	7.98703e-05	30.132
19	rs921915	0.587905	0.0138882	0.00224013	377234	0.00010188	38.4364

## Sheet: Table S4
Table S4 Instrumental variables for cognitive performance (significant level of P < 5e-08)
Note: *EAF：effect allele frequency; SE: standard error; SNP, single nucleotide polymorphism;
	SNP	effect_allele.exposure	other_allele.exposure	effect_allele.outcome	other_allele.outcome	beta.exposure	beta.outcome	eaf.exposure	eaf.outcome	remove	palindromic	ambiguous	id.outcome	chr	pos	se.outcome	samplesize.outcome	pval.outcome	outcome	originalname.outcome	outcome.deprecated	mr_keep.outcome	data_source.outcome	pval.exposure	se.exposure	pos.exposure	samplesize.exposure	chr.exposure	id.exposure	exposure	mr_keep.exposure	pval_origin.exposure	data_source.exposure	action	SNP_index	mr_keep
1	rs1009950	T	G	T	G	-0.01903	-0.000680379	0.4184	0.408816	FALSE	FALSE	FALSE	ebi-a-GCST006097	7	157536448	0.00225385	377234	0.760001	Moderate to vigorous physical activity levels || id:ebi-a-GCST006097	Moderate to vigorous physical activity levels	Moderate to vigorous physical activity levels || ||	TRUE	igd	8.1508e-11	0.00293	157536448	257841	7	ebi-a-GCST006572	Cognitive performance || id:ebi-a-GCST006572	TRUE	reported	igd	2	1	TRUE
2	rs10129426	A	G	A	G	0.01926	-0.00437099	0.5306	0.541291	FALSE	FALSE	FALSE	ebi-a-GCST006097	14	104018455	0.00222152	377234	0.0490004	Moderate to vigorous physical activity levels || id:ebi-a-GCST006097	Moderate to vigorous physical activity levels	Moderate to vigorous physical activity levels || ||	TRUE	igd	1.86982e-11	0.00287	104018455	257841	14	ebi-a-GCST006572	Cognitive performance || id:ebi-a-GCST006572	TRUE	reported	igd	2	1	TRUE
3	rs10189857	G	A	G	A	-0.02289	0.00278604	0.4184	0.431468	FALSE	FALSE	FALSE	ebi-a-GCST006097	2	60713235	0.00222867	377234	0.21	Moderate to vigorous physical activity levels || id:ebi-a-GCST006097	Moderate to vigorous physical activity levels	Moderate to vigorous physical activity levels || ||	TRUE	igd	2.03002e-15	0.00288	60713235	257841	2	ebi-a-GCST006572	Cognitive performance || id:ebi-a-GCST006572	TRUE	reported	igd	2	1	TRUE
4	rs10191758	G	A	G	A	0.01965	-0.00564223	0.381	0.39232	FALSE	FALSE	FALSE	ebi-a-GCST006097	2	144263280	0.00226302	377234	0.0129999	Moderate to vigorous physical activity levels || id:ebi-a-GCST006097	Moderate to vigorous physical activity levels	Moderate to vigorous physical activity levels || ||	TRUE	igd	1.71002e-11	0.00292	144263280	257841	2	ebi-a-GCST006572	Cognitive performance || id:ebi-a-GCST006572	TRUE	reported	igd	2	1	TRUE
5	rs1035738	T	C	T	C	0.05092	-0.00635266	0.02721	0.035484	FALSE	FALSE	FALSE	ebi-a-GCST006097	15	52196830	0.00609845	377234	0.3	Moderate to vigorous physical activity levels || id:ebi-a-GCST006097	Moderate to vigorous physical activity levels	Moderate to vigorous physical activity levels || ||	TRUE	igd	3.46976e-11	0.00769	52196830	257841	15	ebi-a-GCST006572	Cognitive performance || id:ebi-a-GCST006572	TRUE	reported	igd	2	1	TRUE
6	rs10497818	T	A	T	A	-0.01715	0.00372204	0.4303	0.431823	FALSE	TRUE	TRUE	ebi-a-GCST006097	2	199498173	0.00223946	377234	0.0969996	Moderate to vigorous physical activity levels || id:ebi-a-GCST006097	Moderate to vigorous physical activity levels	Moderate to vigorous physical activity levels || ||	TRUE	igd	2.65003e-09	0.00288	199498173	257841	2	ebi-a-GCST006572	Cognitive performance || id:ebi-a-GCST006572	TRUE	reported	igd	2	1	FALSE
7	rs1064608	C	G	C	G	-0.01884	-0.00793641	0.3639	0.349285	FALSE	TRUE	FALSE	ebi-a-GCST006097	11	47640429	0.00230632	377234	0.000580003	Moderate to vigorous physical activity levels || id:ebi-a-GCST006097	Moderate to vigorous physical activity levels	Moderate to vigorous physical activity levels || ||	TRUE	igd	2.86003e-10	0.00299	47640429	257841	11	ebi-a-GCST006572	Cognitive performance || id:ebi-a-GCST006572	TRUE	reported	igd	2	1	TRUE
8	rs10865397	G	A	G	A	0.01675	0.00305281	0.5221	0.522184	FALSE	FALSE	FALSE	ebi-a-GCST006097	2	73358292	0.00224269	377234	0.17	Moderate to vigorous physical activity levels || id:ebi-a-GCST006097	Moderate to vigorous physical activity levels	Moderate to vigorous physical activity levels || ||	TRUE	igd	6.84006e-09	0.00289	73358292	257841	2	ebi-a-GCST006572	Cognitive performance || id:ebi-a-GCST006572	TRUE	reported	igd	2	1	TRUE
9	rs10874938	T	A	T	A	-0.02364	-0.0042501	0.5068	0.51266	FALSE	TRUE	TRUE	ebi-a-GCST006097	1	96175936	0.00220533	377234	0.0539995	Moderate to vigorous physical activity levels || id:ebi-a-GCST006097	Moderate to vigorous physical activity levels	Moderate to vigorous physical activity levels || ||	TRUE	igd	1.18987e-16	0.00285	96175936	257841	1	ebi-a-GCST006572	Cognitive performance || id:ebi-a-GCST006572	TRUE	reported	igd	2	1	FALSE
10	rs10875914	G	A	G	A	0.02373	-0.0030038	0.3554	0.401721	FALSE	FALSE	FALSE	ebi-a-GCST006097	12	49422094	0.00225053	377234	0.18	Moderate to vigorous physical activity levels || id:ebi-a-GCST006097	Moderate to vigorous physical activity levels	Moderate to vigorous physical activity levels || ||	TRUE	igd	3.44985e-16	0.00291	49422094	257841	12	ebi-a-GCST006572	Cognitive performance || id:ebi-a-GCST006572	TRUE	reported	igd	2	1	TRUE
11	rs10990610	C	T	C	T	0.02498	-0.00332585	0.165	0.162361	FALSE	FALSE	FALSE	ebi-a-GCST006097	9	99100713	0.00299901	377234	0.27	Moderate to vigorous physical activity levels || id:ebi-a-GCST006097	Moderate to vigorous physical activity levels	Moderate to vigorous physical activity levels || ||	TRUE	igd	8.6896e-11	0.00385	99100713	257841	9	ebi-a-GCST006572	Cognitive performance || id:ebi-a-GCST006572	TRUE	reported	igd	2	1	TRUE
12	rs11079849	T	C	T	C	0.01996	0.0012153	0.3078	0.329036	FALSE	FALSE	FALSE	ebi-a-GCST006097	17	47090785	0.00235053	377234	0.61	Moderate to vigorous physical activity levels || id:ebi-a-GCST006097	Moderate to vigorous physical activity levels	Moderate to vigorous physical activity levels || ||	TRUE	igd	5.95937e-11	0.00305	47090785	257841	17	ebi-a-GCST006572	Cognitive performance || id:ebi-a-GCST006572	TRUE	reported	igd	2	1	TRUE
13	rs11117646	A	T	A	T	-0.02248	0.00148924	0.1905	0.198346	FALSE	TRUE	FALSE	ebi-a-GCST006097	1	216830128	0.00276023	377234	0.59	Moderate to vigorous physical activity levels || id:ebi-a-GCST006097	Moderate to vigorous physical activity levels	Moderate to vigorous physical activity levels || ||	TRUE	igd	3.65999e-10	0.00359	216830128	257841	1	ebi-a-GCST006572	Cognitive performance || id:ebi-a-GCST006572	TRUE	reported	igd	2	1	TRUE
14	rs11123820	G	A	G	A	0.0243	0.000519034	0.4065	0.394839	FALSE	FALSE	FALSE	ebi-a-GCST006097	2	100871186	0.00226687	377234	0.82	Moderate to vigorous physical activity levels || id:ebi-a-GCST006097	Moderate to vigorous physical activity levels	Moderate to vigorous physical activity levels || ||	TRUE	igd	9.17065e-17	0.00292	100871186	257841	2	ebi-a-GCST006572	Cognitive performance || id:ebi-a-GCST006572	TRUE	reported	igd	2	1	TRUE
15	rs11138947	T	C	T	C	0.01737	0.00192737	0.733	0.723469	FALSE	FALSE	FALSE	ebi-a-GCST006097	9	72110562	0.00246657	377234	0.43	Moderate to vigorous physical activity levels || id:ebi-a-GCST006097	Moderate to vigorous physical activity levels	Moderate to vigorous physical activity levels || ||	TRUE	igd	4.83003e-08	0.00318	72110562	257841	9	ebi-a-GCST006572	Cognitive performance || id:ebi-a-GCST006572	TRUE	reported	igd	2	1	TRUE
16	rs11210871	G	C	G	C	0.01917	-0.00509322	0.6701	0.700599	FALSE	TRUE	FALSE	ebi-a-GCST006097	1	44029353	0.00240772	377234	0.0340001	Moderate to vigorous physical activity levels || id:ebi-a-GCST006097	Moderate to vigorous physical activity levels	Moderate to vigorous physical activity levels || ||	TRUE	igd	7.67008e-10	0.00312	44029353	257841	1	ebi-a-GCST006572	Cognitive performance || id:ebi-a-GCST006572	TRUE	reported	igd	2	1	TRUE
17	rs11259916	G	A	G	A	0.01744	-0.00438988	0.733	0.717799	FALSE	FALSE	FALSE	ebi-a-GCST006097	15	84361518	0.00245103	377234	0.0729995	Moderate to vigorous physical activity levels || id:ebi-a-GCST006097	Moderate to vigorous physical activity levels	Moderate to vigorous physical activity levels || ||	TRUE	igd	3.52996e-08	0.00316	84361518	257841	15	ebi-a-GCST006572	Cognitive performance || id:ebi-a-GCST006572	TRUE	reported	igd	2	1	TRUE
18	rs112780312	A	G	A	G	-0.02121	0.0100592	0.2534	0.274798	FALSE	FALSE	FALSE	ebi-a-GCST006097	1	153797015	0.00249815	377234	5.69994e-05	Moderate to vigorous physical activity levels || id:ebi-a-GCST006097	Moderate to vigorous physical activity levels	Moderate to vigorous physical activity levels || ||	TRUE	igd	3.72992e-11	0.00321	153797015	257841	1	ebi-a-GCST006572	Cognitive performance || id:ebi-a-GCST006572	TRUE	reported	igd	2	1	TRUE
19	rs1144593	G	A	G	A	0.02276	-0.00508792	0.2993	0.30297	FALSE	FALSE	FALSE	ebi-a-GCST006097	1	110030945	0.00240157	377234	0.0340001	Moderate to vigorous physical activity levels || id:ebi-a-GCST006097	Moderate to vigorous physical activity levels	Moderate to vigorous physical activity levels || ||	TRUE	igd	1.82012e-13	0.00309	110030945	257841	1	ebi-a-GCST006572	Cognitive performance || id:ebi-a-GCST006572	TRUE	reported	igd	2	1	TRUE
20	rs11662271	C	T	C	T	-0.0232	0.00200349	0.5153	0.525297	FALSE	FALSE	FALSE	ebi-a-GCST006097	18	50907365	0.0022129	377234	0.37	Moderate to vigorous physical activity levels || id:ebi-a-GCST006097	Moderate to vigorous physical activity levels	Moderate to vigorous physical activity levels || ||	TRUE	igd	4.39036e-16	0.00285	50907365	257841	18	ebi-a-GCST006572	Cognitive performance || id:ebi-a-GCST006572	TRUE	reported	igd	2	1	TRUE
21	rs11693702	A	T	A	T	-0.02045	0.00671419	0.449	0.463774	FALSE	TRUE	TRUE	ebi-a-GCST006097	2	162802184	0.00221593	377234	0.00239999	Moderate to vigorous physical activity levels || id:ebi-a-GCST006097	Moderate to vigorous physical activity levels	Moderate to vigorous physical activity levels || ||	TRUE	igd	9.17065e-13	0.00286	162802184	257841	2	ebi-a-GCST006572	Cognitive performance || id:ebi-a-GCST006572	TRUE	reported	igd	2	1	FALSE
22	rs11720523	A	C	A	C	0.01622	0.00467053	0.4456	0.431422	FALSE	FALSE	FALSE	ebi-a-GCST006097	3	71545170	0.00222787	377234	0.0359998	Moderate to vigorous physical activity levels || id:ebi-a-GCST006097	Moderate to vigorous physical activity levels	Moderate to vigorous physical activity levels || ||	TRUE	igd	1.73002e-08	0.00288	71545170	257841	3	ebi-a-GCST006572	Cognitive performance || id:ebi-a-GCST006572	TRUE	reported	igd	2	1	TRUE
23	rs11793831	T	G	T	G	0.02693	-0.00539282	0.4354	0.416858	FALSE	FALSE	FALSE	ebi-a-GCST006097	9	23362311	0.00223928	377234	0.016	Moderate to vigorous physical activity levels || id:ebi-a-GCST006097	Moderate to vigorous physical activity levels	Moderate to vigorous physical activity levels || ||	TRUE	igd	1.69005e-20	0.0029	23362311	257841	9	ebi-a-GCST006572	Cognitive performance || id:ebi-a-GCST006572	TRUE	reported	igd	2	1	TRUE
24	rs12435486	A	G	A	G	-0.01823	0.0134821	0.2483	0.245485	FALSE	FALSE	FALSE	ebi-a-GCST006097	14	98670849	0.00257326	377234	1.6e-07	Moderate to vigorous physical activity levels || id:ebi-a-GCST006097	Moderate to vigorous physical activity levels	Moderate to vigorous physical activity levels || ||	TRUE	igd	3.74999e-08	0.00331	98670849	257841	14	ebi-a-GCST006572	Cognitive performance || id:ebi-a-GCST006572	TRUE	reported	igd	2	1	TRUE
25	rs12439619	G	T	G	T	0.01994	-0.0082745	0.3129	0.313339	FALSE	FALSE	FALSE	ebi-a-GCST006097	15	82546946	0.00237655	377234	0.0005	Moderate to vigorous physical activity levels || id:ebi-a-GCST006097	Moderate to vigorous physical activity levels	Moderate to vigorous physical activity levels || ||	TRUE	igd	7.93963e-11	0.00307	82546946	257841	15	ebi-a-GCST006572	Cognitive performance || id:ebi-a-GCST006572	TRUE	reported	igd	2	1	TRUE
26	rs12441495	C	G	C	G	-0.02575	0.00394211	0.1361	0.131669	FALSE	TRUE	FALSE	ebi-a-GCST006097	15	41222487	0.00325411	377234	0.23	Moderate to vigorous physical activity levels || id:ebi-a-GCST006097	Moderate to vigorous physical activity levels	Moderate to vigorous physical activity levels || ||	TRUE	igd	1.24e-09	0.00424	41222487	257841	15	ebi-a-GCST006572	Cognitive performance || id:ebi-a-GCST006572	TRUE	reported	igd	2	1	TRUE
27	rs12448902	G	C	G	C	-0.026	-0.00208098	0.3197	0.394753	FALSE	TRUE	FALSE	ebi-a-GCST006097	16	28871191	0.00226157	377234	0.36	Moderate to vigorous physical activity levels || id:ebi-a-GCST006097	Moderate to vigorous physical activity levels	Moderate to vigorous physical activity levels || ||	TRUE	igd	5.12035e-19	0.00292	28871191	257841	16	ebi-a-GCST006572	Cognitive performance || id:ebi-a-GCST006572	TRUE	reported	igd	2	1	TRUE
28	rs12535854	G	C	G	C	0.01783	-0.000976547	0.6667	0.667507	FALSE	TRUE	FALSE	ebi-a-GCST006097	7	105063372	0.00236283	377234	0.68	Moderate to vigorous physical activity levels || id:ebi-a-GCST006097	Moderate to vigorous physical activity levels	Moderate to vigorous physical activity levels || ||	TRUE	igd	4.45995e-09	0.00304	105063372	257841	7	ebi-a-GCST006572	Cognitive performance || id:ebi-a-GCST006572	TRUE	reported	igd	2	1	TRUE
29	rs12536800	C	G	C	G	0.01939	-0.0104941	0.2806	0.275561	FALSE	TRUE	FALSE	ebi-a-GCST006097	7	128381058	0.0024672	377234	2.1e-05	Moderate to vigorous physical activity levels || id:ebi-a-GCST006097	Moderate to vigorous physical activity levels	Moderate to vigorous physical activity levels || ||	TRUE	igd	1.52999e-09	0.00321	128381058	257841	7	ebi-a-GCST006572	Cognitive performance || id:ebi-a-GCST006572	TRUE	reported	igd	2	1	TRUE
30	rs12635303	T	C	T	C	0.01849	-0.00734072	0.2925	0.30904	FALSE	FALSE	FALSE	ebi-a-GCST006097	3	8246179	0.00239042	377234	0.0021	Moderate to vigorous physical activity levels || id:ebi-a-GCST006097	Moderate to vigorous physical activity levels	Moderate to vigorous physical activity levels || ||	TRUE	igd	2.20999e-09	0.00309	8246179	257841	3	ebi-a-GCST006572	Cognitive performance || id:ebi-a-GCST006572	TRUE	reported	igd	2	1	TRUE
31	rs12773747	A	T	A	T	0.0205	-0.00161979	0.2262	0.242624	FALSE	TRUE	FALSE	ebi-a-GCST006097	10	67188211	0.00259473	377234	0.53	Moderate to vigorous physical activity levels || id:ebi-a-GCST006097	Moderate to vigorous physical activity levels	Moderate to vigorous physical activity levels || ||	TRUE	igd	6.73008e-10	0.00332	67188211	257841	10	ebi-a-GCST006572	Cognitive performance || id:ebi-a-GCST006572	TRUE	reported	igd	2	1	TRUE
32	rs13107325	T	C	T	C	-0.05434	-0.00525019	0.09014	0.074193	FALSE	FALSE	FALSE	ebi-a-GCST006097	4	103188709	0.00421091	377234	0.21	Moderate to vigorous physical activity levels || id:ebi-a-GCST006097	Moderate to vigorous physical activity levels	Moderate to vigorous physical activity levels || ||	TRUE	igd	1.08993e-23	0.00542	103188709	257841	4	ebi-a-GCST006572	Cognitive performance || id:ebi-a-GCST006572	TRUE	reported	igd	2	1	TRUE
33	rs13120565	T	A	T	A	0.01825	0.00313075	0.6429	0.623393	FALSE	TRUE	FALSE	ebi-a-GCST006097	4	10704137	0.00228571	377234	0.17	Moderate to vigorous physical activity levels || id:ebi-a-GCST006097	Moderate to vigorous physical activity levels	Moderate to vigorous physical activity levels || ||	TRUE	igd	5.66005e-10	0.00294	10704137	257841	4	ebi-a-GCST006572	Cognitive performance || id:ebi-a-GCST006572	TRUE	reported	igd	2	1	TRUE
34	rs13163336	A	C	A	C	0.0317	-0.00579362	0.1735	0.157657	FALSE	FALSE	FALSE	ebi-a-GCST006097	5	87943710	0.00301718	377234	0.0549997	Moderate to vigorous physical activity levels || id:ebi-a-GCST006097	Moderate to vigorous physical activity levels	Moderate to vigorous physical activity levels || ||	TRUE	igd	5.03965e-16	0.00391	87943710	257841	5	ebi-a-GCST006572	Cognitive performance || id:ebi-a-GCST006572	TRUE	reported	igd	2	1	TRUE
35	rs13253386	G	T	G	T	0.01836	-0.00369753	0.5051	0.51147	FALSE	FALSE	FALSE	ebi-a-GCST006097	8	14002020	0.00220977	377234	0.0940005	Moderate to vigorous physical activity levels || id:ebi-a-GCST006097	Moderate to vigorous physical activity levels	Moderate to vigorous physical activity levels || ||	TRUE	igd	1.26e-10	0.00285	14002020	257841	8	ebi-a-GCST006572	Cognitive performance || id:ebi-a-GCST006572	TRUE	reported	igd	2	1	TRUE
36	rs136554	A	G	A	G	0.01586	-0.00325635	0.4592	0.44124	FALSE	FALSE	FALSE	ebi-a-GCST006097	22	27255690	0.00222316	377234	0.14	Moderate to vigorous physical activity levels || id:ebi-a-GCST006097	Moderate to vigorous physical activity levels	Moderate to vigorous physical activity levels || ||	TRUE	igd	3.52996e-08	0.00288	27255690	257841	22	ebi-a-GCST006572	Cognitive performance || id:ebi-a-GCST006572	TRUE	reported	igd	2	1	TRUE
37	rs1391438	C	T	C	T	-0.01691	-0.000227065	0.6854	0.687497	FALSE	FALSE	FALSE	ebi-a-GCST006097	4	106151843	0.00237788	377234	0.92	Moderate to vigorous physical activity levels || id:ebi-a-GCST006097	Moderate to vigorous physical activity levels	Moderate to vigorous physical activity levels || ||	TRUE	igd	3.26002e-08	0.00306	106151843	257841	4	ebi-a-GCST006572	Cognitive performance || id:ebi-a-GCST006572	TRUE	reported	igd	2	1	TRUE
38	rs1408579	T	C	T	C	0.0168	-0.00519894	0.5	0.497164	FALSE	FALSE	FALSE	ebi-a-GCST006097	10	101912194	0.0022032	377234	0.0179999	Moderate to vigorous physical activity levels || id:ebi-a-GCST006097	Moderate to vigorous physical activity levels	Moderate to vigorous physical activity levels || ||	TRUE	igd	4.10998e-09	0.00286	101912194	257841	10	ebi-a-GCST006572	Cognitive performance || id:ebi-a-GCST006572	TRUE	reported	igd	2	1	TRUE
39	rs1415802	G	T	G	T	0.01718	0.000204922	0.4031	0.379772	FALSE	FALSE	FALSE	ebi-a-GCST006097	20	22245008	0.00227842	377234	0.93	Moderate to vigorous physical activity levels || id:ebi-a-GCST006097	Moderate to vigorous physical activity levels	Moderate to vigorous physical activity levels || ||	TRUE	igd	4.76003e-09	0.00293	22245008	257841	20	ebi-a-GCST006572	Cognitive performance || id:ebi-a-GCST006572	TRUE	reported	igd	2	1	TRUE
40	rs1479073	T	C	T	C	-0.01731	0.00161745	0.6888	0.686417	FALSE	FALSE	FALSE	ebi-a-GCST006097	5	101105998	0.002388	377234	0.5	Moderate to vigorous physical activity levels || id:ebi-a-GCST006097	Moderate to vigorous physical activity levels	Moderate to vigorous physical activity levels || ||	TRUE	igd	1.91999e-08	0.00308	101105998	257841	5	ebi-a-GCST006572	Cognitive performance || id:ebi-a-GCST006572	TRUE	reported	igd	2	1	TRUE
41	rs148696809	C	T	C	T	0.0406	-0.0189754	0.08163	0.118111	FALSE	FALSE	FALSE	ebi-a-GCST006097	6	28934352	0.00341909	377234	2.90001e-08	Moderate to vigorous physical activity levels || id:ebi-a-GCST006097	Moderate to vigorous physical activity levels	Moderate to vigorous physical activity levels || ||	TRUE	igd	7.78933e-20	0.00445	28934352	257841	6	ebi-a-GCST006572	Cognitive performance || id:ebi-a-GCST006572	TRUE	reported	igd	2	1	TRUE
42	rs1507010	G	A	G	A	0.01728	-0.00358761	0.4949	0.509262	FALSE	FALSE	FALSE	ebi-a-GCST006097	16	7657373	0.00222324	377234	0.11	Moderate to vigorous physical activity levels || id:ebi-a-GCST006097	Moderate to vigorous physical activity levels	Moderate to vigorous physical activity levels || ||	TRUE	igd	1.51999e-09	0.00286	7657373	257841	16	ebi-a-GCST006572	Cognitive performance || id:ebi-a-GCST006572	TRUE	reported	igd	2	1	TRUE
43	rs1523048	C	T	C	T	-0.01776	0.00171235	0.6003	0.639119	FALSE	FALSE	FALSE	ebi-a-GCST006097	3	35527409	0.00230172	377234	0.46	Moderate to vigorous physical activity levels || id:ebi-a-GCST006097	Moderate to vigorous physical activity levels	Moderate to vigorous physical activity levels || ||	TRUE	igd	2.06001e-09	0.00296	35527409	257841	3	ebi-a-GCST006572	Cognitive performance || id:ebi-a-GCST006572	TRUE	reported	igd	2	1	TRUE
44	rs1567154	T	C	T	C	-0.02045	0.00012088	0.2653	0.211378	FALSE	FALSE	FALSE	ebi-a-GCST006097	16	50950805	0.00270547	377234	0.96	Moderate to vigorous physical activity levels || id:ebi-a-GCST006097	Moderate to vigorous physical activity levels	Moderate to vigorous physical activity levels || ||	TRUE	igd	4.51004e-09	0.00349	50950805	257841	16	ebi-a-GCST006572	Cognitive performance || id:ebi-a-GCST006572	TRUE	reported	igd	2	1	TRUE
45	rs159428	C	T	C	T	-0.01676	0.00673697	0.5068	0.525621	FALSE	FALSE	FALSE	ebi-a-GCST006097	20	31099311	0.00220709	377234	0.00230001	Moderate to vigorous physical activity levels || id:ebi-a-GCST006097	Moderate to vigorous physical activity levels	Moderate to vigorous physical activity levels || ||	TRUE	igd	6.96996e-09	0.00289	31099311	257841	20	ebi-a-GCST006572	Cognitive performance || id:ebi-a-GCST006572	TRUE	reported	igd	2	1	TRUE
46	rs17002025	A	G	A	G	0.02886	-0.00352881	0.1378	0.124611	FALSE	FALSE	FALSE	ebi-a-GCST006097	19	12530177	0.00337747	377234	0.3	Moderate to vigorous physical activity levels || id:ebi-a-GCST006097	Moderate to vigorous physical activity levels	Moderate to vigorous physical activity levels || ||	TRUE	igd	2.96006e-11	0.00434	12530177	257841	19	ebi-a-GCST006572	Cognitive performance || id:ebi-a-GCST006572	TRUE	reported	igd	2	1	TRUE
47	rs17049085	C	T	C	T	-0.02602	-0.00413496	0.1105	0.11854	FALSE	FALSE	FALSE	ebi-a-GCST006097	2	57948003	0.00341215	377234	0.23	Moderate to vigorous physical activity levels || id:ebi-a-GCST006097	Moderate to vigorous physical activity levels	Moderate to vigorous physical activity levels || ||	TRUE	igd	3.44001e-09	0.0044	57948003	257841	2	ebi-a-GCST006572	Cognitive performance || id:ebi-a-GCST006572	TRUE	reported	igd	2	1	TRUE
48	rs17106817	C	T	C	T	-0.01854	0.0041152	0.284	0.274772	FALSE	FALSE	FALSE	ebi-a-GCST006097	14	69716957	0.00248381	377234	0.0980009	Moderate to vigorous physical activity levels || id:ebi-a-GCST006097	Moderate to vigorous physical activity levels	Moderate to vigorous physical activity levels || ||	TRUE	igd	6.88002e-09	0.0032	69716957	257841	14	ebi-a-GCST006572	Cognitive performance || id:ebi-a-GCST006572	TRUE	reported	igd	2	1	TRUE
49	rs17428810	C	T	C	T	-0.01788	0.00135918	0.2687	0.303461	FALSE	FALSE	FALSE	ebi-a-GCST006097	2	32736043	0.00240223	377234	0.57	Moderate to vigorous physical activity levels || id:ebi-a-GCST006097	Moderate to vigorous physical activity levels	Moderate to vigorous physical activity levels || ||	TRUE	igd	8.10009e-09	0.0031	32736043	257841	2	ebi-a-GCST006572	Cognitive performance || id:ebi-a-GCST006572	TRUE	reported	igd	2	1	TRUE
50	rs1812587	T	G	T	G	-0.01594	0.00207564	0.4456	0.45588	FALSE	FALSE	FALSE	ebi-a-GCST006097	5	62991802	0.00221783	377234	0.35	Moderate to vigorous physical activity levels || id:ebi-a-GCST006097	Moderate to vigorous physical activity levels	Moderate to vigorous physical activity levels || ||	TRUE	igd	2.84001e-08	0.00287	62991802	257841	5	ebi-a-GCST006572	Cognitive performance || id:ebi-a-GCST006572	TRUE	reported	igd	2	1	TRUE
51	rs1892419	C	T	C	T	-0.0276	0.00523765	0.233	0.230375	FALSE	FALSE	FALSE	ebi-a-GCST006097	1	41781151	0.00261944	377234	0.0460002	Moderate to vigorous physical activity levels || id:ebi-a-GCST006097	Moderate to vigorous physical activity levels	Moderate to vigorous physical activity levels || ||	TRUE	igd	3.46976e-16	0.00338	41781151	257841	1	ebi-a-GCST006572	Cognitive performance || id:ebi-a-GCST006572	TRUE	reported	igd	2	1	TRUE
52	rs1906252	A	C	A	C	0.03071	-0.00767833	0.4966	0.487183	FALSE	FALSE	FALSE	ebi-a-GCST006097	6	98550289	0.00221631	377234	0.000530005	Moderate to vigorous physical activity levels || id:ebi-a-GCST006097	Moderate to vigorous physical activity levels	Moderate to vigorous physical activity levels || ||	TRUE	igd	4.44017e-27	0.00285	98550289	257841	6	ebi-a-GCST006572	Cognitive performance || id:ebi-a-GCST006572	TRUE	reported	igd	2	1	TRUE
53	rs2005078	A	G	A	G	-0.01924	-0.00618879	0.6667	0.665914	FALSE	FALSE	FALSE	ebi-a-GCST006097	9	131942676	0.00233995	377234	0.00819993	Moderate to vigorous physical activity levels || id:ebi-a-GCST006097	Moderate to vigorous physical activity levels	Moderate to vigorous physical activity levels || ||	TRUE	igd	2.35001e-10	0.00304	131942676	257841	9	ebi-a-GCST006572	Cognitive performance || id:ebi-a-GCST006572	TRUE	reported	igd	2	1	TRUE
54	rs2143103	A	G	A	G	0.02382	-0.00727417	0.1446	0.135963	FALSE	FALSE	FALSE	ebi-a-GCST006097	1	22430069	0.00321878	377234	0.0239999	Moderate to vigorous physical activity levels || id:ebi-a-GCST006097	Moderate to vigorous physical activity levels	Moderate to vigorous physical activity levels || ||	TRUE	igd	9.64007e-09	0.00415	22430069	257841	1	ebi-a-GCST006572	Cognitive performance || id:ebi-a-GCST006572	TRUE	reported	igd	2	1	TRUE
55	rs2180111	G	A	G	A	-0.01812	0.00308697	0.7058	0.728217	FALSE	FALSE	FALSE	ebi-a-GCST006097	14	27177910	0.00247933	377234	0.21	Moderate to vigorous physical activity levels || id:ebi-a-GCST006097	Moderate to vigorous physical activity levels	Moderate to vigorous physical activity levels || ||	TRUE	igd	1.54999e-08	0.0032	27177910	257841	14	ebi-a-GCST006572	Cognitive performance || id:ebi-a-GCST006572	TRUE	reported	igd	2	1	TRUE
56	rs2239647	C	A	C	A	0.02093	-0.00214836	0.5459	0.550855	FALSE	FALSE	FALSE	ebi-a-GCST006097	14	33292743	0.00221959	377234	0.33	Moderate to vigorous physical activity levels || id:ebi-a-GCST006097	Moderate to vigorous physical activity levels	Moderate to vigorous physical activity levels || ||	TRUE	igd	4.70977e-13	0.00289	33292743	257841	14	ebi-a-GCST006572	Cognitive performance || id:ebi-a-GCST006572	TRUE	reported	igd	2	1	TRUE
57	rs2295499	T	C	T	C	-0.0191	0.00510356	0.4439	0.442739	FALSE	FALSE	FALSE	ebi-a-GCST006097	4	2717690	0.00221897	377234	0.021	Moderate to vigorous physical activity levels || id:ebi-a-GCST006097	Moderate to vigorous physical activity levels	Moderate to vigorous physical activity levels || ||	TRUE	igd	2.84971e-11	0.00287	2717690	257841	4	ebi-a-GCST006572	Cognitive performance || id:ebi-a-GCST006572	TRUE	reported	igd	2	1	TRUE
58	rs2352974	T	C	T	C	-0.0319	0.0043119	0.5	0.488869	FALSE	FALSE	FALSE	ebi-a-GCST006097	3	49890613	0.00221249	377234	0.051	Moderate to vigorous physical activity levels || id:ebi-a-GCST006097	Moderate to vigorous physical activity levels	Moderate to vigorous physical activity levels || ||	TRUE	igd	5.19039e-29	0.00285	49890613	257841	3	ebi-a-GCST006572	Cognitive performance || id:ebi-a-GCST006572	TRUE	reported	igd	2	1	TRUE
59	rs2426132	C	G	C	G	0.027	-0.00162333	0.4728	0.458517	FALSE	TRUE	TRUE	ebi-a-GCST006097	20	47723127	0.00221326	377234	0.46	Moderate to vigorous physical activity levels || id:ebi-a-GCST006097	Moderate to vigorous physical activity levels	Moderate to vigorous physical activity levels || ||	TRUE	igd	3.57026e-21	0.00286	47723127	257841	20	ebi-a-GCST006572	Cognitive performance || id:ebi-a-GCST006572	TRUE	reported	igd	2	1	FALSE
60	rs2439649	A	G	A	G	0.01605	-0.000786291	0.5391	0.541013	FALSE	FALSE	FALSE	ebi-a-GCST006097	9	111875463	0.00221589	377234	0.719999	Moderate to vigorous physical activity levels || id:ebi-a-GCST006097	Moderate to vigorous physical activity levels	Moderate to vigorous physical activity levels || ||	TRUE	igd	1.98002e-08	0.00286	111875463	257841	9	ebi-a-GCST006572	Cognitive performance || id:ebi-a-GCST006572	TRUE	reported	igd	2	1	TRUE
61	rs2478281	A	G	A	G	-0.02273	0.00443793	0.7534	0.743389	FALSE	FALSE	FALSE	ebi-a-GCST006097	13	106640324	0.0025209	377234	0.0779992	Moderate to vigorous physical activity levels || id:ebi-a-GCST006097	Moderate to vigorous physical activity levels	Moderate to vigorous physical activity levels || ||	TRUE	igd	3.10027e-12	0.00326	106640324	257841	13	ebi-a-GCST006572	Cognitive performance || id:ebi-a-GCST006572	TRUE	reported	igd	2	1	TRUE
62	rs26046	T	C	T	C	-0.02044	0.00287956	0.3673	0.399404	FALSE	FALSE	FALSE	ebi-a-GCST006097	5	111010072	0.00226765	377234	0.2	Moderate to vigorous physical activity levels || id:ebi-a-GCST006097	Moderate to vigorous physical activity levels	Moderate to vigorous physical activity levels || ||	TRUE	igd	2.44006e-12	0.00292	111010072	257841	5	ebi-a-GCST006572	Cognitive performance || id:ebi-a-GCST006572	TRUE	reported	igd	2	1	TRUE
63	rs2647995	C	T	C	T	0.01861	-0.00438429	0.2925	0.282756	FALSE	FALSE	FALSE	ebi-a-GCST006097	16	51577196	0.00245392	377234	0.0739997	Moderate to vigorous physical activity levels || id:ebi-a-GCST006097	Moderate to vigorous physical activity levels	Moderate to vigorous physical activity levels || ||	TRUE	igd	4.98999e-09	0.00318	51577196	257841	16	ebi-a-GCST006572	Cognitive performance || id:ebi-a-GCST006572	TRUE	reported	igd	2	1	TRUE
64	rs2652454	C	T	C	T	0.01587	-0.00401862	0.5221	0.557223	FALSE	FALSE	FALSE	ebi-a-GCST006097	2	155670915	0.00221744	377234	0.0700003	Moderate to vigorous physical activity levels || id:ebi-a-GCST006097	Moderate to vigorous physical activity levels	Moderate to vigorous physical activity levels || ||	TRUE	igd	3.22998e-08	0.00287	155670915	257841	2	ebi-a-GCST006572	Cognitive performance || id:ebi-a-GCST006572	TRUE	reported	igd	2	1	TRUE
65	rs2721173	T	C	T	C	-0.01661	-1.61294e-05	0.449	0.471512	FALSE	FALSE	FALSE	ebi-a-GCST006097	8	145744429	0.00220796	377234	0.99	Moderate to vigorous physical activity levels || id:ebi-a-GCST006097	Moderate to vigorous physical activity levels	Moderate to vigorous physical activity levels || ||	TRUE	igd	6.12999e-09	0.00286	145744429	257841	8	ebi-a-GCST006572	Cognitive performance || id:ebi-a-GCST006572	TRUE	reported	igd	2	1	TRUE
66	rs2737339	G	A	G	A	0.01827	0.00179637	0.4099	0.388875	FALSE	FALSE	FALSE	ebi-a-GCST006097	8	31013470	0.00225927	377234	0.43	Moderate to vigorous physical activity levels || id:ebi-a-GCST006097	Moderate to vigorous physical activity levels	Moderate to vigorous physical activity levels || ||	TRUE	igd	4.14e-10	0.00292	31013470	257841	8	ebi-a-GCST006572	Cognitive performance || id:ebi-a-GCST006572	TRUE	reported	igd	2	1	TRUE
67	rs276626	G	A	G	A	-0.02075	0.00964751	0.1616	0.169757	FALSE	FALSE	FALSE	ebi-a-GCST006097	16	13156649	0.00293679	377234	0.001	Moderate to vigorous physical activity levels || id:ebi-a-GCST006097	Moderate to vigorous physical activity levels	Moderate to vigorous physical activity levels || ||	TRUE	igd	4.81005e-08	0.0038	13156649	257841	16	ebi-a-GCST006572	Cognitive performance || id:ebi-a-GCST006572	TRUE	reported	igd	2	1	TRUE
68	rs2799399	T	G	T	G	-0.01572	-0.000340982	0.4167	0.434641	FALSE	FALSE	FALSE	ebi-a-GCST006097	10	130113462	0.0022347	377234	0.88	Moderate to vigorous physical activity levels || id:ebi-a-GCST006097	Moderate to vigorous physical activity levels	Moderate to vigorous physical activity levels || ||	TRUE	igd	4.54999e-08	0.00288	130113462	257841	10	ebi-a-GCST006572	Cognitive performance || id:ebi-a-GCST006572	TRUE	reported	igd	2	1	TRUE
69	rs2806048	G	A	G	A	0.01897	-0.000561919	0.3571	0.381799	FALSE	FALSE	FALSE	ebi-a-GCST006097	14	73529094	0.00231626	377234	0.81	Moderate to vigorous physical activity levels || id:ebi-a-GCST006097	Moderate to vigorous physical activity levels	Moderate to vigorous physical activity levels || ||	TRUE	igd	1.25e-10	0.00295	73529094	257841	14	ebi-a-GCST006572	Cognitive performance || id:ebi-a-GCST006572	TRUE	reported	igd	2	1	TRUE
70	rs2836921	A	G	A	G	0.01632	0.0028258	0.3248	0.357182	FALSE	FALSE	FALSE	ebi-a-GCST006097	21	40516070	0.00230981	377234	0.22	Moderate to vigorous physical activity levels || id:ebi-a-GCST006097	Moderate to vigorous physical activity levels	Moderate to vigorous physical activity levels || ||	TRUE	igd	4.20998e-08	0.00298	40516070	257841	21	ebi-a-GCST006572	Cognitive performance || id:ebi-a-GCST006572	TRUE	reported	igd	2	1	TRUE
71	rs2852931	A	G	A	G	0.02842	-0.000793415	0.8486	0.879229	FALSE	FALSE	FALSE	ebi-a-GCST006097	11	90566513	0.00340718	377234	0.82	Moderate to vigorous physical activity levels || id:ebi-a-GCST006097	Moderate to vigorous physical activity levels	Moderate to vigorous physical activity levels || ||	TRUE	igd	1.07999e-10	0.0044	90566513	257841	11	ebi-a-GCST006572	Cognitive performance || id:ebi-a-GCST006572	TRUE	reported	igd	2	1	TRUE
72	rs287883	T	A	T	A	0.01858	-0.00695405	0.3112	0.292139	FALSE	TRUE	FALSE	ebi-a-GCST006097	6	157140077	0.00244269	377234	0.00439997	Moderate to vigorous physical activity levels || id:ebi-a-GCST006097	Moderate to vigorous physical activity levels	Moderate to vigorous physical activity levels || ||	TRUE	igd	3.27997e-09	0.00314	157140077	257841	6	ebi-a-GCST006572	Cognitive performance || id:ebi-a-GCST006572	TRUE	reported	igd	2	1	TRUE
73	rs297589	A	T	A	T	0.01715	-0.00271736	0.6684	0.700878	FALSE	TRUE	FALSE	ebi-a-GCST006097	2	157358750	0.00241276	377234	0.26	Moderate to vigorous physical activity levels || id:ebi-a-GCST006097	Moderate to vigorous physical activity levels	Moderate to vigorous physical activity levels || ||	TRUE	igd	3.73001e-08	0.00312	157358750	257841	2	ebi-a-GCST006572	Cognitive performance || id:ebi-a-GCST006572	TRUE	reported	igd	2	1	TRUE
74	rs2977464	T	C	T	C	0.02091	-0.00433212	0.1684	0.188742	FALSE	FALSE	FALSE	ebi-a-GCST006097	8	141545193	0.00282535	377234	0.13	Moderate to vigorous physical activity levels || id:ebi-a-GCST006097	Moderate to vigorous physical activity levels	Moderate to vigorous physical activity levels || ||	TRUE	igd	9.86007e-09	0.00365	141545193	257841	8	ebi-a-GCST006572	Cognitive performance || id:ebi-a-GCST006572	TRUE	reported	igd	2	1	TRUE
75	rs3113262	C	G	C	G	-0.01963	-0.00474504	0.4932	0.497428	FALSE	TRUE	TRUE	ebi-a-GCST006097	7	69993342	0.00221271	377234	0.032	Moderate to vigorous physical activity levels || id:ebi-a-GCST006097	Moderate to vigorous physical activity levels	Moderate to vigorous physical activity levels || ||	TRUE	igd	6.18016e-12	0.00286	69993342	257841	7	ebi-a-GCST006572	Cognitive performance || id:ebi-a-GCST006572	TRUE	reported	igd	2	1	FALSE
76	rs3128341	C	T	C	T	0.03343	-0.000468316	0.8248	0.795096	FALSE	FALSE	FALSE	ebi-a-GCST006097	1	72749848	0.00273039	377234	0.86	Moderate to vigorous physical activity levels || id:ebi-a-GCST006097	Moderate to vigorous physical activity levels	Moderate to vigorous physical activity levels || ||	TRUE	igd	2.52e-21	0.00353	72749848	257841	1	ebi-a-GCST006572	Cognitive performance || id:ebi-a-GCST006572	TRUE	reported	igd	2	1	TRUE
77	rs335426	C	A	C	A	-0.01973	0.00447186	0.5	0.544052	FALSE	FALSE	FALSE	ebi-a-GCST006097	5	176908731	0.00228106	377234	0.05	Moderate to vigorous physical activity levels || id:ebi-a-GCST006097	Moderate to vigorous physical activity levels	Moderate to vigorous physical activity levels || ||	TRUE	igd	7.23936e-12	0.00288	176908731	257841	5	ebi-a-GCST006572	Cognitive performance || id:ebi-a-GCST006572	TRUE	reported	igd	2	1	TRUE
78	rs34802460	T	C	T	C	0.01917	-0.00127376	0.2568	0.225935	FALSE	FALSE	FALSE	ebi-a-GCST006097	19	713148	0.00265594	377234	0.630001	Moderate to vigorous physical activity levels || id:ebi-a-GCST006097	Moderate to vigorous physical activity levels	Moderate to vigorous physical activity levels || ||	TRUE	igd	4.94003e-08	0.00351	713148	257841	19	ebi-a-GCST006572	Cognitive performance || id:ebi-a-GCST006572	TRUE	reported	igd	2	1	TRUE
79	rs34811474	A	G	A	G	0.02761	-0.000274458	0.2296	0.231783	FALSE	FALSE	FALSE	ebi-a-GCST006097	4	25408838	0.00261284	377234	0.92	Moderate to vigorous physical activity levels || id:ebi-a-GCST006097	Moderate to vigorous physical activity levels	Moderate to vigorous physical activity levels || ||	TRUE	igd	1.42004e-15	0.00346	25408838	257841	4	ebi-a-GCST006572	Cognitive performance || id:ebi-a-GCST006572	TRUE	reported	igd	2	1	TRUE
80	rs35526560	G	C	G	C	-0.01958	0.00167324	0.5765	0.524972	FALSE	TRUE	TRUE	ebi-a-GCST006097	7	71741232	0.00220635	377234	0.450001	Moderate to vigorous physical activity levels || id:ebi-a-GCST006097	Moderate to vigorous physical activity levels	Moderate to vigorous physical activity levels || ||	TRUE	igd	6.70965e-12	0.00285	71741232	257841	7	ebi-a-GCST006572	Cognitive performance || id:ebi-a-GCST006572	TRUE	reported	igd	2	1	FALSE
81	rs35853157	T	A	T	A	0.0172	0.00238551	0.3163	0.329038	FALSE	TRUE	FALSE	ebi-a-GCST006097	4	140780768	0.00234738	377234	0.31	Moderate to vigorous physical activity levels || id:ebi-a-GCST006097	Moderate to vigorous physical activity levels	Moderate to vigorous physical activity levels || ||	TRUE	igd	1.47999e-08	0.00304	140780768	257841	4	ebi-a-GCST006572	Cognitive performance || id:ebi-a-GCST006572	TRUE	reported	igd	2	1	TRUE
82	rs3735478	T	G	T	G	0.02279	-0.00168811	0.2857	0.29104	FALSE	FALSE	FALSE	ebi-a-GCST006097	7	44800176	0.00242604	377234	0.49	Moderate to vigorous physical activity levels || id:ebi-a-GCST006097	Moderate to vigorous physical activity levels	Moderate to vigorous physical activity levels || ||	TRUE	igd	4.84953e-13	0.00315	44800176	257841	7	ebi-a-GCST006572	Cognitive performance || id:ebi-a-GCST006572	TRUE	reported	igd	2	1	TRUE
83	rs3740422	C	G	C	G	-0.02553	0.00994239	0.3486	0.351414	FALSE	TRUE	FALSE	ebi-a-GCST006097	10	103565960	0.00231602	377234	1.79999e-05	Moderate to vigorous physical activity levels || id:ebi-a-GCST006097	Moderate to vigorous physical activity levels	Moderate to vigorous physical activity levels || ||	TRUE	igd	1.22999e-17	0.00299	103565960	257841	10	ebi-a-GCST006572	Cognitive performance || id:ebi-a-GCST006572	TRUE	reported	igd	2	1	TRUE
84	rs3843954	C	G	C	G	-0.02084	0.00529713	0.25	0.291747	FALSE	TRUE	FALSE	ebi-a-GCST006097	13	58548511	0.00242838	377234	0.0290001	Moderate to vigorous physical activity levels || id:ebi-a-GCST006097	Moderate to vigorous physical activity levels	Moderate to vigorous physical activity levels || ||	TRUE	igd	6.32995e-10	0.00337	58548511	257841	13	ebi-a-GCST006572	Cognitive performance || id:ebi-a-GCST006572	TRUE	reported	igd	2	1	TRUE
85	rs3860537	C	T	C	T	-0.01861	0.00702273	0.7585	0.763204	FALSE	FALSE	FALSE	ebi-a-GCST006097	3	108103433	0.00261508	377234	0.00719996	Moderate to vigorous physical activity levels || id:ebi-a-GCST006097	Moderate to vigorous physical activity levels	Moderate to vigorous physical activity levels || ||	TRUE	igd	3.14e-08	0.00336	108103433	257841	3	ebi-a-GCST006572	Cognitive performance || id:ebi-a-GCST006572	TRUE	reported	igd	2	1	TRUE
86	rs39302	C	T	C	T	0.02088	-0.00205476	0.8078	0.79926	FALSE	FALSE	FALSE	ebi-a-GCST006097	7	21467190	0.00277125	377234	0.46	Moderate to vigorous physical activity levels || id:ebi-a-GCST006097	Moderate to vigorous physical activity levels	Moderate to vigorous physical activity levels || ||	TRUE	igd	4.49004e-09	0.00356	21467190	257841	7	ebi-a-GCST006572	Cognitive performance || id:ebi-a-GCST006572	TRUE	reported	igd	2	1	TRUE
87	rs3943667	T	C	T	C	-0.0185	0.00299128	0.7228	0.707158	FALSE	FALSE	FALSE	ebi-a-GCST006097	4	65831184	0.00242234	377234	0.22	Moderate to vigorous physical activity levels || id:ebi-a-GCST006097	Moderate to vigorous physical activity levels	Moderate to vigorous physical activity levels || ||	TRUE	igd	3.56e-09	0.00313	65831184	257841	4	ebi-a-GCST006572	Cognitive performance || id:ebi-a-GCST006572	TRUE	reported	igd	2	1	TRUE
88	rs4342312	A	C	A	C	-0.01793	0.00210802	0.3741	0.37932	FALSE	FALSE	FALSE	ebi-a-GCST006097	5	92477890	0.00227361	377234	0.35	Moderate to vigorous physical activity levels || id:ebi-a-GCST006097	Moderate to vigorous physical activity levels	Moderate to vigorous physical activity levels || ||	TRUE	igd	1.05e-09	0.00294	92477890	257841	5	ebi-a-GCST006572	Cognitive performance || id:ebi-a-GCST006572	TRUE	reported	igd	2	1	TRUE
89	rs4347883	C	T	C	T	0.01595	-0.00366044	0.4388	0.447753	FALSE	FALSE	FALSE	ebi-a-GCST006097	2	44185129	0.0022273	377234	0.1	Moderate to vigorous physical activity levels || id:ebi-a-GCST006097	Moderate to vigorous physical activity levels	Moderate to vigorous physical activity levels || ||	TRUE	igd	2.78997e-08	0.00287	44185129	257841	2	ebi-a-GCST006572	Cognitive performance || id:ebi-a-GCST006572	TRUE	reported	igd	2	1	TRUE
90	rs4463213	A	G	A	G	0.02183	-0.00134671	0.5408	0.554332	FALSE	FALSE	FALSE	ebi-a-GCST006097	5	139545748	0.00222051	377234	0.54	Moderate to vigorous physical activity levels || id:ebi-a-GCST006097	Moderate to vigorous physical activity levels	Moderate to vigorous physical activity levels || ||	TRUE	igd	2.55976e-14	0.00287	139545748	257841	5	ebi-a-GCST006572	Cognitive performance || id:ebi-a-GCST006572	TRUE	reported	igd	2	1	TRUE
91	rs4470366	A	T	A	T	0.01815	-0.00383441	0.5612	0.582461	FALSE	TRUE	TRUE	ebi-a-GCST006097	2	71534617	0.00223313	377234	0.0860003	Moderate to vigorous physical activity levels || id:ebi-a-GCST006097	Moderate to vigorous physical activity levels	Moderate to vigorous physical activity levels || ||	TRUE	igd	3.61002e-10	0.0029	71534617	257841	2	ebi-a-GCST006572	Cognitive performance || id:ebi-a-GCST006572	TRUE	reported	igd	2	1	FALSE
92	rs4744250	A	G	A	G	0.01834	0.000538677	0.352	0.344611	FALSE	FALSE	FALSE	ebi-a-GCST006097	9	96271752	0.00231959	377234	0.82	Moderate to vigorous physical activity levels || id:ebi-a-GCST006097	Moderate to vigorous physical activity levels	Moderate to vigorous physical activity levels || ||	TRUE	igd	9.34007e-10	0.003	96271752	257841	9	ebi-a-GCST006572	Cognitive performance || id:ebi-a-GCST006572	TRUE	reported	igd	2	1	TRUE
93	rs4937860	G	A	G	A	-0.02588	0.00214453	0.09354	0.107026	FALSE	FALSE	FALSE	ebi-a-GCST006097	11	133814713	0.00356277	377234	0.55	Moderate to vigorous physical activity levels || id:ebi-a-GCST006097	Moderate to vigorous physical activity levels	Moderate to vigorous physical activity levels || ||	TRUE	igd	2.39999e-08	0.00464	133814713	257841	11	ebi-a-GCST006572	Cognitive performance || id:ebi-a-GCST006572	TRUE	reported	igd	2	1	TRUE
94	rs4976976	A	G	A	G	0.01978	-0.00810938	0.3861	0.40023	FALSE	FALSE	FALSE	ebi-a-GCST006097	8	143311653	0.00225384	377234	0.00032	Moderate to vigorous physical activity levels || id:ebi-a-GCST006097	Moderate to vigorous physical activity levels	Moderate to vigorous physical activity levels || ||	TRUE	igd	1.23994e-11	0.00292	143311653	257841	8	ebi-a-GCST006572	Cognitive performance || id:ebi-a-GCST006572	TRUE	reported	igd	2	1	TRUE
95	rs56135595	T	G	T	G	-0.02216	0.0106664	0.1412	0.149816	FALSE	FALSE	FALSE	ebi-a-GCST006097	6	51690108	0.00309508	377234	0.000569994	Moderate to vigorous physical activity levels || id:ebi-a-GCST006097	Moderate to vigorous physical activity levels	Moderate to vigorous physical activity levels || ||	TRUE	igd	2.97002e-08	0.004	51690108	257841	6	ebi-a-GCST006572	Cognitive performance || id:ebi-a-GCST006572	TRUE	reported	igd	2	1	TRUE
96	rs56290130	A	T	A	T	-0.01692	0.0091346	0.3231	0.328498	FALSE	TRUE	FALSE	ebi-a-GCST006097	12	93327911	0.00237148	377234	0.00012	Moderate to vigorous physical activity levels || id:ebi-a-GCST006097	Moderate to vigorous physical activity levels	Moderate to vigorous physical activity levels || ||	TRUE	igd	2.59e-08	0.00304	93327911	257841	12	ebi-a-GCST006572	Cognitive performance || id:ebi-a-GCST006572	TRUE	reported	igd	2	1	TRUE
97	rs5751191	C	T	C	T	-0.02214	0.00575854	0.4779	0.50373	FALSE	FALSE	FALSE	ebi-a-GCST006097	22	42370991	0.00221661	377234	0.00940005	Moderate to vigorous physical activity levels || id:ebi-a-GCST006097	Moderate to vigorous physical activity levels	Moderate to vigorous physical activity levels || ||	TRUE	igd	8.931e-15	0.00286	42370991	257841	22	ebi-a-GCST006572	Cognitive performance || id:ebi-a-GCST006572	TRUE	reported	igd	2	1	TRUE
98	rs5757670	A	G	A	G	0.02009	0.000923902	0.6582	0.690867	FALSE	FALSE	FALSE	ebi-a-GCST006097	22	39829736	0.00239394	377234	0.7	Moderate to vigorous physical activity levels || id:ebi-a-GCST006097	Moderate to vigorous physical activity levels	Moderate to vigorous physical activity levels || ||	TRUE	igd	7.1499e-11	0.00308	39829736	257841	22	ebi-a-GCST006572	Cognitive performance || id:ebi-a-GCST006572	TRUE	reported	igd	2	1	TRUE
99	rs58489175	G	A	G	A	0.02121	-0.00371209	0.2823	0.283299	FALSE	FALSE	FALSE	ebi-a-GCST006097	7	127674026	0.002447	377234	0.13	Moderate to vigorous physical activity levels || id:ebi-a-GCST006097	Moderate to vigorous physical activity levels	Moderate to vigorous physical activity levels || ||	TRUE	igd	2.02023e-11	0.00316	127674026	257841	7	ebi-a-GCST006572	Cognitive performance || id:ebi-a-GCST006572	TRUE	reported	igd	2	1	TRUE
100	rs602512	A	G	A	G	0.01948	-0.00103359	0.3861	0.385686	FALSE	FALSE	FALSE	ebi-a-GCST006097	11	95561682	0.00226416	377234	0.649999	Moderate to vigorous physical activity levels || id:ebi-a-GCST006097	Moderate to vigorous physical activity levels	Moderate to vigorous physical activity levels || ||	TRUE	igd	2.92012e-11	0.00293	95561682	257841	11	ebi-a-GCST006572	Cognitive performance || id:ebi-a-GCST006572	TRUE	reported	igd	2	1	TRUE
101	rs61815057	A	G	A	G	0.01681	-0.00324636	0.3963	0.392129	FALSE	FALSE	FALSE	ebi-a-GCST006097	1	103673345	0.00225954	377234	0.15	Moderate to vigorous physical activity levels || id:ebi-a-GCST006097	Moderate to vigorous physical activity levels	Moderate to vigorous physical activity levels || ||	TRUE	igd	8.05991e-09	0.00292	103673345	257841	1	ebi-a-GCST006572	Cognitive performance || id:ebi-a-GCST006572	TRUE	reported	igd	2	1	TRUE
102	rs62047970	G	T	G	T	0.01879	-0.00334583	0.4218	0.437247	FALSE	FALSE	FALSE	ebi-a-GCST006097	16	70756181	0.00225264	377234	0.14	Moderate to vigorous physical activity levels || id:ebi-a-GCST006097	Moderate to vigorous physical activity levels	Moderate to vigorous physical activity levels || ||	TRUE	igd	9.8992e-11	0.00291	70756181	257841	16	ebi-a-GCST006572	Cognitive performance || id:ebi-a-GCST006572	TRUE	reported	igd	2	1	TRUE
103	rs62065449	C	T	C	T	-0.02626	0.00918879	0.2007	0.185278	FALSE	FALSE	FALSE	ebi-a-GCST006097	17	43569909	0.00283769	377234	0.0012	Moderate to vigorous physical activity levels || id:ebi-a-GCST006097	Moderate to vigorous physical activity levels	Moderate to vigorous physical activity levels || ||	TRUE	igd	1.07994e-12	0.00369	43569909	257841	17	ebi-a-GCST006572	Cognitive performance || id:ebi-a-GCST006572	TRUE	reported	igd	2	1	TRUE
104	rs620729	C	A	C	A	0.01912	-0.00299782	0.3146	0.324125	FALSE	FALSE	FALSE	ebi-a-GCST006097	6	11508671	0.0023589	377234	0.2	Moderate to vigorous physical activity levels || id:ebi-a-GCST006097	Moderate to vigorous physical activity levels	Moderate to vigorous physical activity levels || ||	TRUE	igd	3.05e-10	0.00304	11508671	257841	6	ebi-a-GCST006572	Cognitive performance || id:ebi-a-GCST006572	TRUE	reported	igd	2	1	TRUE
105	rs62169190	T	C	T	C	-0.02043	-0.00177569	0.1769	0.188446	FALSE	FALSE	FALSE	ebi-a-GCST006097	2	145078775	0.0028419	377234	0.53	Moderate to vigorous physical activity levels || id:ebi-a-GCST006097	Moderate to vigorous physical activity levels	Moderate to vigorous physical activity levels || ||	TRUE	igd	2.74e-08	0.00368	145078775	257841	2	ebi-a-GCST006572	Cognitive performance || id:ebi-a-GCST006572	TRUE	reported	igd	2	1	TRUE
106	rs6509441	A	T	A	T	0.01876	-0.00317106	0.2313	0.233475	FALSE	TRUE	FALSE	ebi-a-GCST006097	19	50138023	0.00262463	377234	0.23	Moderate to vigorous physical activity levels || id:ebi-a-GCST006097	Moderate to vigorous physical activity levels	Moderate to vigorous physical activity levels || ||	TRUE	igd	3.29997e-08	0.0034	50138023	257841	19	ebi-a-GCST006572	Cognitive performance || id:ebi-a-GCST006572	TRUE	reported	igd	2	1	TRUE
107	rs6535809	G	A	G	A	-0.01956	0.00936678	0.5	0.489296	FALSE	FALSE	FALSE	ebi-a-GCST006097	4	152592933	0.00220662	377234	2.19999e-05	Moderate to vigorous physical activity levels || id:ebi-a-GCST006097	Moderate to vigorous physical activity levels	Moderate to vigorous physical activity levels || ||	TRUE	igd	6.89922e-12	0.00285	152592933	257841	4	ebi-a-GCST006572	Cognitive performance || id:ebi-a-GCST006572	TRUE	reported	igd	2	1	TRUE
108	rs6550835	A	G	A	G	-0.02479	0.00128869	0.3027	0.32461	FALSE	FALSE	FALSE	ebi-a-GCST006097	3	24062661	0.00235112	377234	0.58	Moderate to vigorous physical activity levels || id:ebi-a-GCST006097	Moderate to vigorous physical activity levels	Moderate to vigorous physical activity levels || ||	TRUE	igd	3.88956e-16	0.00304	24062661	257841	3	ebi-a-GCST006572	Cognitive performance || id:ebi-a-GCST006572	TRUE	reported	igd	2	1	TRUE
109	rs6587843	T	C	T	C	0.01774	-0.00606478	0.4711	0.491568	FALSE	FALSE	FALSE	ebi-a-GCST006097	1	59540811	0.00220432	377234	0.00589997	Moderate to vigorous physical activity levels || id:ebi-a-GCST006097	Moderate to vigorous physical activity levels	Moderate to vigorous physical activity levels || ||	TRUE	igd	4.82003e-10	0.00285	59540811	257841	1	ebi-a-GCST006572	Cognitive performance || id:ebi-a-GCST006572	TRUE	reported	igd	2	1	TRUE
110	rs66752974	A	C	A	C	-0.02214	-0.00315528	0.1582	0.164663	FALSE	FALSE	FALSE	ebi-a-GCST006097	3	137057630	0.00297679	377234	0.29	Moderate to vigorous physical activity levels || id:ebi-a-GCST006097	Moderate to vigorous physical activity levels	Moderate to vigorous physical activity levels || ||	TRUE	igd	7.92009e-09	0.00384	137057630	257841	3	ebi-a-GCST006572	Cognitive performance || id:ebi-a-GCST006572	TRUE	reported	igd	2	1	TRUE
111	rs6708515	G	A	G	A	-0.01671	-0.00627231	0.6207	0.646231	FALSE	FALSE	FALSE	ebi-a-GCST006097	2	41606931	0.00230728	377234	0.00659994	Moderate to vigorous physical activity levels || id:ebi-a-GCST006097	Moderate to vigorous physical activity levels	Moderate to vigorous physical activity levels || ||	TRUE	igd	2.10999e-08	0.00298	41606931	257841	2	ebi-a-GCST006572	Cognitive performance || id:ebi-a-GCST006572	TRUE	reported	igd	2	1	TRUE
112	rs6718450	C	G	C	G	0.01698	0.00480627	0.4252	0.364502	FALSE	TRUE	TRUE	ebi-a-GCST006097	2	117697406	0.00228625	377234	0.0359998	Moderate to vigorous physical activity levels || id:ebi-a-GCST006097	Moderate to vigorous physical activity levels	Moderate to vigorous physical activity levels || ||	TRUE	igd	9.52994e-09	0.00296	117697406	257841	2	ebi-a-GCST006572	Cognitive performance || id:ebi-a-GCST006572	TRUE	reported	igd	2	1	FALSE
113	rs6798941	T	C	T	C	0.01794	-0.0022798	0.2857	0.296182	FALSE	FALSE	FALSE	ebi-a-GCST006097	3	52893465	0.00242392	377234	0.35	Moderate to vigorous physical activity levels || id:ebi-a-GCST006097	Moderate to vigorous physical activity levels	Moderate to vigorous physical activity levels || ||	TRUE	igd	9.52994e-09	0.00313	52893465	257841	3	ebi-a-GCST006572	Cognitive performance || id:ebi-a-GCST006572	TRUE	reported	igd	2	1	TRUE
114	rs6819372	G	A	G	A	0.01865	-0.00145687	0.5357	0.533832	FALSE	FALSE	FALSE	ebi-a-GCST006097	4	67970101	0.00221041	377234	0.51	Moderate to vigorous physical activity levels || id:ebi-a-GCST006097	Moderate to vigorous physical activity levels	Moderate to vigorous physical activity levels || ||	TRUE	igd	6.57052e-11	0.00286	67970101	257841	4	ebi-a-GCST006572	Cognitive performance || id:ebi-a-GCST006572	TRUE	reported	igd	2	1	TRUE
115	rs6860626	T	C	T	C	-0.02149	-0.00361676	0.1412	0.174459	FALSE	FALSE	FALSE	ebi-a-GCST006097	5	59636727	0.00290444	377234	0.21	Moderate to vigorous physical activity levels || id:ebi-a-GCST006097	Moderate to vigorous physical activity levels	Moderate to vigorous physical activity levels || ||	TRUE	igd	1.10999e-08	0.00376	59636727	257841	5	ebi-a-GCST006572	Cognitive performance || id:ebi-a-GCST006572	TRUE	reported	igd	2	1	TRUE
116	rs6903716	G	A	G	A	-0.01842	-0.00520148	0.2738	0.290585	FALSE	FALSE	FALSE	ebi-a-GCST006097	6	21956404	0.00242716	377234	0.032	Moderate to vigorous physical activity levels || id:ebi-a-GCST006097	Moderate to vigorous physical activity levels	Moderate to vigorous physical activity levels || ||	TRUE	igd	4.61998e-09	0.00314	21956404	257841	6	ebi-a-GCST006572	Cognitive performance || id:ebi-a-GCST006572	TRUE	reported	igd	2	1	TRUE
117	rs6952104	T	C	T	C	0.01864	-0.00415338	0.5221	0.507164	FALSE	FALSE	FALSE	ebi-a-GCST006097	7	24171927	0.00220319	377234	0.0589997	Moderate to vigorous physical activity levels || id:ebi-a-GCST006097	Moderate to vigorous physical activity levels	Moderate to vigorous physical activity levels || ||	TRUE	igd	6.31975e-11	0.00285	24171927	257841	7	ebi-a-GCST006572	Cognitive performance || id:ebi-a-GCST006572	TRUE	reported	igd	2	1	TRUE
118	rs6975134	C	T	C	T	0.02194	-0.0145465	0.4218	0.400082	FALSE	FALSE	FALSE	ebi-a-GCST006097	7	133531432	0.00225522	377234	1.09999e-10	Moderate to vigorous physical activity levels || id:ebi-a-GCST006097	Moderate to vigorous physical activity levels	Moderate to vigorous physical activity levels || ||	TRUE	igd	4.54988e-14	0.00291	133531432	257841	7	ebi-a-GCST006572	Cognitive performance || id:ebi-a-GCST006572	TRUE	reported	igd	2	1	TRUE
119	rs702222	T	C	T	C	-0.02002	0.00666817	0.3282	0.359486	FALSE	FALSE	FALSE	ebi-a-GCST006097	9	23805569	0.00230014	377234	0.00369999	Moderate to vigorous physical activity levels || id:ebi-a-GCST006097	Moderate to vigorous physical activity levels	Moderate to vigorous physical activity levels || ||	TRUE	igd	1.65997e-11	0.00297	23805569	257841	9	ebi-a-GCST006572	Cognitive performance || id:ebi-a-GCST006572	TRUE	reported	igd	2	1	TRUE
120	rs7044246	T	C	T	C	0.01748	-0.00414169	0.6956	0.7008	FALSE	FALSE	FALSE	ebi-a-GCST006097	9	134866271	0.00240625	377234	0.0850002	Moderate to vigorous physical activity levels || id:ebi-a-GCST006097	Moderate to vigorous physical activity levels	Moderate to vigorous physical activity levels || ||	TRUE	igd	1.96002e-08	0.00311	134866271	257841	9	ebi-a-GCST006572	Cognitive performance || id:ebi-a-GCST006572	TRUE	reported	igd	2	1	TRUE
121	rs7256776	A	G	A	G	-0.01864	0.00442804	0.2908	0.329492	FALSE	FALSE	FALSE	ebi-a-GCST006097	19	31952890	0.00234778	377234	0.0589997	Moderate to vigorous physical activity levels || id:ebi-a-GCST006097	Moderate to vigorous physical activity levels	Moderate to vigorous physical activity levels || ||	TRUE	igd	9.28004e-10	0.00304	31952890	257841	19	ebi-a-GCST006572	Cognitive performance || id:ebi-a-GCST006572	TRUE	reported	igd	2	1	TRUE
122	rs72739469	C	T	C	T	0.03577	-0.00689502	0.05442	0.055578	FALSE	FALSE	FALSE	ebi-a-GCST006097	15	65738080	0.00488486	377234	0.16	Moderate to vigorous physical activity levels || id:ebi-a-GCST006097	Moderate to vigorous physical activity levels	Moderate to vigorous physical activity levels || ||	TRUE	igd	7.51e-09	0.00619	65738080	257841	15	ebi-a-GCST006572	Cognitive performance || id:ebi-a-GCST006572	TRUE	reported	igd	2	1	TRUE
123	rs72821233	T	G	T	G	-0.0201	0.00305807	0.2721	0.266737	FALSE	FALSE	FALSE	ebi-a-GCST006097	10	93349867	0.0025034	377234	0.22	Moderate to vigorous physical activity levels || id:ebi-a-GCST006097	Moderate to vigorous physical activity levels	Moderate to vigorous physical activity levels || ||	TRUE	igd	4.88e-10	0.00323	93349867	257841	10	ebi-a-GCST006572	Cognitive performance || id:ebi-a-GCST006572	TRUE	reported	igd	2	1	TRUE
124	rs7312770	T	C	T	C	-0.016	0.00191321	0.5136	0.50016	FALSE	FALSE	FALSE	ebi-a-GCST006097	12	56467587	0.00221992	377234	0.39	Moderate to vigorous physical activity levels || id:ebi-a-GCST006097	Moderate to vigorous physical activity levels	Moderate to vigorous physical activity levels || ||	TRUE	igd	2.52e-08	0.00287	56467587	257841	12	ebi-a-GCST006572	Cognitive performance || id:ebi-a-GCST006572	TRUE	reported	igd	2	1	TRUE
125	rs73189617	G	C	G	C	0.01854	0.00210891	0.3299	0.296693	FALSE	TRUE	FALSE	ebi-a-GCST006097	3	184069126	0.00242347	377234	0.38	Moderate to vigorous physical activity levels || id:ebi-a-GCST006097	Moderate to vigorous physical activity levels	Moderate to vigorous physical activity levels || ||	TRUE	igd	3.86999e-09	0.00315	184069126	257841	3	ebi-a-GCST006572	Cognitive performance || id:ebi-a-GCST006572	TRUE	reported	igd	2	1	TRUE
126	rs73845427	A	G	A	G	-0.0466	0.0117137	0.02891	0.032469	FALSE	FALSE	FALSE	ebi-a-GCST006097	3	85327518	0.00621089	377234	0.0589997	Moderate to vigorous physical activity levels || id:ebi-a-GCST006097	Moderate to vigorous physical activity levels	Moderate to vigorous physical activity levels || ||	TRUE	igd	7.69006e-09	0.00807	85327518	257841	3	ebi-a-GCST006572	Cognitive performance || id:ebi-a-GCST006572	TRUE	reported	igd	2	1	TRUE
127	rs73989053	A	G	A	G	-0.02211	0.000648935	0.1616	0.170211	FALSE	FALSE	FALSE	ebi-a-GCST006097	2	213403091	0.00295925	377234	0.83	Moderate to vigorous physical activity levels || id:ebi-a-GCST006097	Moderate to vigorous physical activity levels	Moderate to vigorous physical activity levels || ||	TRUE	igd	6.31001e-09	0.00381	213403091	257841	2	ebi-a-GCST006572	Cognitive performance || id:ebi-a-GCST006572	TRUE	reported	igd	2	1	TRUE
128	rs74370218	T	C	T	C	-0.018	0.00415305	0.3827	0.373697	FALSE	FALSE	FALSE	ebi-a-GCST006097	17	57095212	0.00227903	377234	0.0680002	Moderate to vigorous physical activity levels || id:ebi-a-GCST006097	Moderate to vigorous physical activity levels	Moderate to vigorous physical activity levels || ||	TRUE	igd	9.81002e-10	0.00295	57095212	257841	17	ebi-a-GCST006572	Cognitive performance || id:ebi-a-GCST006572	TRUE	reported	igd	2	1	TRUE
129	rs7573001	C	G	C	G	-0.01647	0.000279084	0.415	0.381364	FALSE	TRUE	FALSE	ebi-a-GCST006097	2	198929896	0.00228035	377234	0.9	Moderate to vigorous physical activity levels || id:ebi-a-GCST006097	Moderate to vigorous physical activity levels	Moderate to vigorous physical activity levels || ||	TRUE	igd	2.35001e-08	0.00295	198929896	257841	2	ebi-a-GCST006572	Cognitive performance || id:ebi-a-GCST006572	TRUE	reported	igd	2	1	TRUE
130	rs7588384	C	G	C	G	-0.01891	0.00864297	0.3129	0.267224	FALSE	TRUE	FALSE	ebi-a-GCST006097	2	163976035	0.00249436	377234	0.000530005	Moderate to vigorous physical activity levels || id:ebi-a-GCST006097	Moderate to vigorous physical activity levels	Moderate to vigorous physical activity levels || ||	TRUE	igd	4.26e-09	0.00322	163976035	257841	2	ebi-a-GCST006572	Cognitive performance || id:ebi-a-GCST006572	TRUE	reported	igd	2	1	TRUE
131	rs75973558	G	A	G	A	-0.02463	0.00878647	0.119	0.129822	FALSE	FALSE	FALSE	ebi-a-GCST006097	5	26880925	0.00327783	377234	0.00729995	Moderate to vigorous physical activity levels || id:ebi-a-GCST006097	Moderate to vigorous physical activity levels	Moderate to vigorous physical activity levels || ||	TRUE	igd	7.38006e-09	0.00426	26880925	257841	5	ebi-a-GCST006572	Cognitive performance || id:ebi-a-GCST006572	TRUE	reported	igd	2	1	TRUE
132	rs7599860	A	C	A	C	0.01967	-0.00293739	0.2279	0.23898	FALSE	FALSE	FALSE	ebi-a-GCST006097	2	186243561	0.00275016	377234	0.29	Moderate to vigorous physical activity levels || id:ebi-a-GCST006097	Moderate to vigorous physical activity levels	Moderate to vigorous physical activity levels || ||	TRUE	igd	3.92004e-09	0.00334	186243561	257841	2	ebi-a-GCST006572	Cognitive performance || id:ebi-a-GCST006572	TRUE	reported	igd	2	1	TRUE
133	rs7626560	T	C	T	C	0.02393	-0.00429406	0.1361	0.159905	FALSE	FALSE	FALSE	ebi-a-GCST006097	3	12475088	0.00305057	377234	0.16	Moderate to vigorous physical activity levels || id:ebi-a-GCST006097	Moderate to vigorous physical activity levels	Moderate to vigorous physical activity levels || ||	TRUE	igd	7.34007e-10	0.00389	12475088	257841	3	ebi-a-GCST006572	Cognitive performance || id:ebi-a-GCST006572	TRUE	reported	igd	2	1	TRUE
134	rs77128898	T	C	T	C	-0.04626	0.00213629	0.02211	0.035151	FALSE	FALSE	FALSE	ebi-a-GCST006097	11	61313525	0.00611159	377234	0.73	Moderate to vigorous physical activity levels || id:ebi-a-GCST006097	Moderate to vigorous physical activity levels	Moderate to vigorous physical activity levels || ||	TRUE	igd	1.72001e-09	0.00768	61313525	257841	11	ebi-a-GCST006572	Cognitive performance || id:ebi-a-GCST006572	TRUE	reported	igd	2	1	TRUE
135	rs78358737	G	T	G	T	0.04248	-0.000375749	0.03401	0.044439	FALSE	FALSE	FALSE	ebi-a-GCST006097	2	118627164	0.00536912	377234	0.94	Moderate to vigorous physical activity levels || id:ebi-a-GCST006097	Moderate to vigorous physical activity levels	Moderate to vigorous physical activity levels || ||	TRUE	igd	6.18002e-10	0.00687	118627164	257841	2	ebi-a-GCST006572	Cognitive performance || id:ebi-a-GCST006572	TRUE	reported	igd	2	1	TRUE
136	rs78382112	A	G	A	G	0.03682	-0.00188273	0.05782	0.051713	FALSE	FALSE	FALSE	ebi-a-GCST006097	1	181535715	0.00502957	377234	0.709999	Moderate to vigorous physical activity levels || id:ebi-a-GCST006097	Moderate to vigorous physical activity levels	Moderate to vigorous physical activity levels || ||	TRUE	igd	8.54004e-09	0.00639	181535715	257841	1	ebi-a-GCST006572	Cognitive performance || id:ebi-a-GCST006572	TRUE	reported	igd	2	1	TRUE
137	rs7963801	C	T	C	T	-0.02296	0.00063432	0.5476	0.571083	FALSE	FALSE	FALSE	ebi-a-GCST006097	12	79685226	0.00224174	377234	0.780001	Moderate to vigorous physical activity levels || id:ebi-a-GCST006097	Moderate to vigorous physical activity levels	Moderate to vigorous physical activity levels || ||	TRUE	igd	3.46019e-15	0.00292	79685226	257841	12	ebi-a-GCST006572	Cognitive performance || id:ebi-a-GCST006572	TRUE	reported	igd	2	1	TRUE
138	rs80170948	G	T	G	T	-0.04589	0.000638897	0.05272	0.04261	FALSE	FALSE	FALSE	ebi-a-GCST006097	5	64020316	0.00570318	377234	0.91	Moderate to vigorous physical activity levels || id:ebi-a-GCST006097	Moderate to vigorous physical activity levels	Moderate to vigorous physical activity levels || ||	TRUE	igd	7.98914e-11	0.00706	64020316	257841	5	ebi-a-GCST006572	Cognitive performance || id:ebi-a-GCST006572	TRUE	reported	igd	2	1	TRUE
139	rs8054299	G	C	G	C	0.02556	-0.00553156	0.3316	0.315074	FALSE	TRUE	FALSE	ebi-a-GCST006097	16	53498655	0.00236935	377234	0.02	Moderate to vigorous physical activity levels || id:ebi-a-GCST006097	Moderate to vigorous physical activity levels	Moderate to vigorous physical activity levels || ||	TRUE	igd	7.21938e-17	0.00306	53498655	257841	16	ebi-a-GCST006572	Cognitive performance || id:ebi-a-GCST006572	TRUE	reported	igd	2	1	TRUE
140	rs8058881	G	C	G	C	0.01831	-0.00717227	0.25	0.254973	FALSE	TRUE	FALSE	ebi-a-GCST006097	16	76524013	0.00253205	377234	0.00460002	Moderate to vigorous physical activity levels || id:ebi-a-GCST006097	Moderate to vigorous physical activity levels	Moderate to vigorous physical activity levels || ||	TRUE	igd	4.14e-08	0.00334	76524013	257841	16	ebi-a-GCST006572	Cognitive performance || id:ebi-a-GCST006572	TRUE	reported	igd	2	1	TRUE
141	rs830383	G	A	G	A	-0.01952	0.00047075	0.631	0.627022	FALSE	FALSE	FALSE	ebi-a-GCST006097	5	165473194	0.00227882	377234	0.84	Moderate to vigorous physical activity levels || id:ebi-a-GCST006097	Moderate to vigorous physical activity levels	Moderate to vigorous physical activity levels || ||	TRUE	igd	3.72992e-11	0.00295	165473194	257841	5	ebi-a-GCST006572	Cognitive performance || id:ebi-a-GCST006572	TRUE	reported	igd	2	1	TRUE
142	rs875361	A	G	A	G	-0.01623	-0.00055791	0.449	0.455661	FALSE	FALSE	FALSE	ebi-a-GCST006097	1	37865954	0.00222394	377234	0.8	Moderate to vigorous physical activity levels || id:ebi-a-GCST006097	Moderate to vigorous physical activity levels	Moderate to vigorous physical activity levels || ||	TRUE	igd	1.5e-08	0.00287	37865954	257841	1	ebi-a-GCST006572	Cognitive performance || id:ebi-a-GCST006572	TRUE	reported	igd	2	1	TRUE
143	rs889169	A	G	A	G	0.01743	-0.00392508	0.5867	0.621926	FALSE	FALSE	FALSE	ebi-a-GCST006097	19	47548678	0.00227887	377234	0.0850002	Moderate to vigorous physical activity levels || id:ebi-a-GCST006097	Moderate to vigorous physical activity levels	Moderate to vigorous physical activity levels || ||	TRUE	igd	6.12999e-09	0.003	47548678	257841	19	ebi-a-GCST006572	Cognitive performance || id:ebi-a-GCST006572	TRUE	reported	igd	2	1	TRUE
144	rs9384679	T	C	T	C	-0.02822	0.0106624	0.4082	0.370268	FALSE	FALSE	FALSE	ebi-a-GCST006097	6	108864419	0.00227997	377234	2.90001e-06	Moderate to vigorous physical activity levels || id:ebi-a-GCST006097	Moderate to vigorous physical activity levels	Moderate to vigorous physical activity levels || ||	TRUE	igd	1.13999e-21	0.00295	108864419	257841	6	ebi-a-GCST006572	Cognitive performance || id:ebi-a-GCST006572	TRUE	reported	igd	2	1	TRUE
145	rs9436866	C	A	C	A	0.03309	0.000755569	0.09524	0.095239	FALSE	FALSE	FALSE	ebi-a-GCST006097	1	69427576	0.00375777	377234	0.84	Moderate to vigorous physical activity levels || id:ebi-a-GCST006097	Moderate to vigorous physical activity levels	Moderate to vigorous physical activity levels || ||	TRUE	igd	6.01035e-12	0.00481	69427576	257841	1	ebi-a-GCST006572	Cognitive performance || id:ebi-a-GCST006572	TRUE	reported	igd	2	1	TRUE
146	rs991871	A	T	A	T	0.0243	-0.0053069	0.7551	0.766821	FALSE	TRUE	FALSE	ebi-a-GCST006097	8	93164505	0.00261105	377234	0.0420001	Moderate to vigorous physical activity levels || id:ebi-a-GCST006097	Moderate to vigorous physical activity levels	Moderate to vigorous physical activity levels || ||	TRUE	igd	5.72005e-13	0.00337	93164505	257841	8	ebi-a-GCST006572	Cognitive performance || id:ebi-a-GCST006572	TRUE	reported	igd	2	1	TRUE
147	rs9930063	C	T	C	T	0.01633	-0.000323455	0.4592	0.440752	FALSE	FALSE	FALSE	ebi-a-GCST006097	16	62194176	0.00222502	377234	0.88	Moderate to vigorous physical activity levels || id:ebi-a-GCST006097	Moderate to vigorous physical activity levels	Moderate to vigorous physical activity levels || ||	TRUE	igd	1.43001e-08	0.00288	62194176	257841	16	ebi-a-GCST006572	Cognitive performance || id:ebi-a-GCST006572	TRUE	reported	igd	2	1	TRUE

## Sheet: Table S5
Table S5 The strength of Instrumental variables for cognitive performance (significant level of P < 5e-08)
Note: *EAF：effect allele frequency; SE: standard error; SNP, single nucleotide polymorphism;
	SNP	EAF	beta	SE	N	R2	F
1	rs1009950	0.4184	-0.01903	0.00293	257841	0.000163576	42.1831
2	rs10129426	0.5306	0.01926	0.00287	257841	0.000174631	45.0345
3	rs10189857	0.4184	-0.02289	0.00288	257841	0.000244934	63.1689
4	rs10191758	0.381	0.01965	0.00292	257841	0.000175603	45.2852
5	rs1035738	0.02721	0.05092	0.00769	257841	0.000170019	43.8451
6	rs10497818	0.4303	-0.01715	0.00288	257841	0.000137509	35.4601
7	rs1064608	0.3639	-0.01884	0.00299	257841	0.000153957	39.7023
8	rs10865397	0.5221	0.01675	0.00289	257841	0.000130264	33.5916
9	rs10874938	0.5068	-0.02364	0.00285	257841	0.00026677	68.8021
10	rs10875914	0.3554	0.02373	0.00291	257841	0.000257837	66.4976
11	rs10990610	0.165	0.02498	0.00385	257841	0.000163245	42.0979
12	rs11079849	0.3078	0.01996	0.00305	257841	0.000166072	42.827
13	rs11117646	0.1905	-0.02248	0.00359	257841	0.00015205	39.2103
14	rs11123820	0.4065	0.0243	0.00292	257841	0.000268521	69.2538
15	rs11138947	0.733	0.01737	0.00318	257841	0.000115703	29.8361
16	rs11210871	0.6701	0.01917	0.00312	257841	0.000146393	37.7513
17	rs11259916	0.733	0.01744	0.00316	257841	0.000118118	30.459
18	rs112780312	0.2534	-0.02121	0.00321	257841	0.000169296	43.6584
19	rs1144593	0.2993	0.02276	0.00309	257841	0.00021037	54.2531
20	rs11662271	0.5153	-0.0232	0.00285	257841	0.000256935	66.2648
21	rs11693702	0.449	-0.02045	0.00286	257841	0.000198251	51.1271
22	rs11720523	0.4456	0.01622	0.00288	257841	0.000123002	31.7186
23	rs11793831	0.4354	0.02693	0.0029	257841	0.000334333	86.233
24	rs12435486	0.2483	-0.01823	0.00331	257841	0.000117629	30.3329
25	rs12439619	0.3129	0.01994	0.00307	257841	0.000163588	42.1862
26	rs12441495	0.1361	-0.02575	0.00424	257841	0.000143024	36.8824
27	rs12448902	0.3197	-0.026	0.00292	257841	0.000307394	79.2826
28	rs12535854	0.6667	0.01783	0.00304	257841	0.000133397	34.3995
29	rs12536800	0.2806	0.01939	0.00321	257841	0.000141492	36.4873
30	rs12635303	0.2925	0.01849	0.00309	257841	0.00013885	35.8058
31	rs12773747	0.2262	0.0205	0.00332	257841	0.000147848	38.1266
32	rs13107325	0.09014	-0.05434	0.00542	257841	0.00038969	100.516
33	rs13120565	0.6429	0.01825	0.00294	257841	0.000149422	38.5325
34	rs13163336	0.1735	0.0317	0.00391	257841	0.00025486	65.7297
35	rs13253386	0.5051	0.01836	0.00285	257841	0.000160929	41.5004
36	rs136554	0.4592	0.01586	0.00288	257841	0.000117603	30.3262
37	rs1391438	0.6854	-0.01691	0.00306	257841	0.000118424	30.538
38	rs1408579	0.5	0.0168	0.00286	257841	0.000133806	34.5051
39	rs1415802	0.4031	0.01718	0.00293	257841	0.000133322	34.3801
40	rs1479073	0.6888	-0.01731	0.00308	257841	0.000122486	31.5856
41	rs148696809	0.08163	0.0406	0.00445	257841	0.00032273	83.2393
42	rs1507010	0.4949	0.01728	0.00286	257841	0.00014156	36.505
43	rs1523048	0.6003	-0.01776	0.00296	257841	0.000139601	35.9997
44	rs1567154	0.2653	-0.02045	0.00349	257841	0.000133145	34.3346
45	rs159428	0.5068	-0.01676	0.00289	257841	0.00013042	33.6317
46	rs17002025	0.1378	0.02886	0.00434	257841	0.000171469	44.2191
47	rs17049085	0.1105	-0.02602	0.0044	257841	0.000135612	34.9708
48	rs17106817	0.284	-0.01854	0.0032	257841	0.00013017	33.5673
49	rs17428810	0.2687	-0.01788	0.0031	257841	0.000129004	33.2666
50	rs1812587	0.4456	-0.01594	0.00287	257841	0.000119621	30.8468
51	rs1892419	0.233	-0.0276	0.00338	257841	0.000258536	66.6778
52	rs1906252	0.4966	0.03071	0.00285	257841	0.000450114	116.109
53	rs2005078	0.6667	-0.01924	0.00304	257841	0.000155326	40.0553
54	rs2143103	0.1446	0.02382	0.00415	257841	0.000127756	32.9446
55	rs2180111	0.7058	-0.01812	0.0032	257841	0.00012434	32.0637
56	rs2239647	0.5459	0.02093	0.00289	257841	0.000203377	52.4493
57	rs2295499	0.4439	-0.0191	0.00287	257841	0.000171742	44.2894
58	rs2352974	0.5	-0.0319	0.00285	257841	0.000485656	125.282
59	rs2426132	0.4728	0.027	0.00286	257841	0.000345536	89.1235
60	rs2439649	0.5391	0.01605	0.00286	257841	0.000122127	31.493
61	rs2478281	0.7534	-0.02273	0.00326	257841	0.000188508	48.6139
62	rs26046	0.3673	-0.02044	0.00292	257841	0.000190003	48.9996
63	rs2647995	0.2925	0.01861	0.00318	257841	0.000132809	34.248
64	rs2652454	0.5221	0.01587	0.00287	257841	0.000118573	30.5764
65	rs2721173	0.449	-0.01661	0.00286	257841	0.000130797	33.729
66	rs2737339	0.4099	0.01827	0.00292	257841	0.000151808	39.1479
67	rs276626	0.1616	-0.02075	0.0038	257841	0.000115629	29.8171
68	rs2799399	0.4167	-0.01572	0.00288	257841	0.000115536	29.7932
69	rs2806048	0.3571	0.01897	0.00295	257841	0.00016035	41.3511
70	rs2836921	0.3248	0.01632	0.00298	257841	0.000116307	29.9919
71	rs2852931	0.8486	0.02842	0.0044	257841	0.000161778	41.7195
72	rs287883	0.3112	0.01858	0.00314	257841	0.000135775	35.013
73	rs297589	0.6684	0.01715	0.00312	257841	0.00011717	30.2145
74	rs2977464	0.1684	0.02091	0.00365	257841	0.000127267	32.8185
75	rs3113262	0.4932	-0.01963	0.00286	257841	0.000182674	47.1091
76	rs3128341	0.8248	0.03343	0.00353	257841	0.000347713	89.685
77	rs335426	0.5	-0.01973	0.00288	257841	0.000181986	46.9317
78	rs34802460	0.2568	0.01917	0.00351	257841	0.000115672	29.8282
79	rs34811474	0.2296	0.02761	0.00346	257841	0.0002469	63.6762
80	rs35526560	0.5765	-0.01958	0.00285	257841	0.000183022	47.1989
81	rs35853157	0.3163	0.0172	0.00304	257841	0.000124138	32.0115
82	rs3735478	0.2857	0.02279	0.00315	257841	0.000202968	52.3437
83	rs3740422	0.3486	-0.02553	0.00299	257841	0.000282673	72.9048
84	rs3843954	0.25	-0.02084	0.00337	257841	0.000148293	38.2413
85	rs3860537	0.7585	-0.01861	0.00336	257841	0.000118963	30.6769
86	rs39302	0.8078	0.02088	0.00356	257841	0.000133399	34.3999
87	rs3943667	0.7228	-0.0185	0.00313	257841	0.00013547	34.9342
88	rs4342312	0.3741	-0.01793	0.00294	257841	0.000144229	37.1931
89	rs4347883	0.4388	0.01595	0.00287	257841	0.000119772	30.8855
90	rs4463213	0.5408	0.02183	0.00287	257841	0.000224334	57.8549
91	rs4470366	0.5612	0.01815	0.0029	257841	0.000151894	39.17
92	rs4744250	0.352	0.01834	0.003	257841	0.000144924	37.3726
93	rs4937860	0.09354	-0.02588	0.00464	257841	0.000120639	31.1092
94	rs4976976	0.3861	0.01978	0.00292	257841	0.000177933	45.8863
95	rs56135595	0.1412	-0.02216	0.004	257841	0.000119019	30.6914
96	rs56290130	0.3231	-0.01692	0.00304	257841	0.000120129	30.9778
97	rs5751191	0.4779	-0.02214	0.00286	257841	0.000232365	59.9266
98	rs5757670	0.6582	0.02009	0.00308	257841	0.000164981	42.5456
99	rs58489175	0.2823	0.02121	0.00316	257841	0.000174695	45.0509
100	rs602512	0.3861	0.01948	0.00293	257841	0.000171402	44.2017
101	rs61815057	0.3963	0.01681	0.00292	257841	0.000128517	33.1411
102	rs62047970	0.4218	0.01879	0.00291	257841	0.000161676	41.6931
103	rs62065449	0.2007	-0.02626	0.00369	257841	0.000196381	50.6446
104	rs620729	0.3146	0.01912	0.00304	257841	0.000153395	39.5572
105	rs62169190	0.1769	-0.02043	0.00368	257841	0.000119519	30.8204
106	rs6509441	0.2313	0.01876	0.0034	257841	0.00011806	30.4442
107	rs6535809	0.5	-0.01956	0.00285	257841	0.000182649	47.1026
108	rs6550835	0.3027	-0.02479	0.00304	257841	0.000257835	66.4971
109	rs6587843	0.4711	0.01774	0.00285	257841	0.000150245	38.7449
110	rs66752974	0.1582	-0.02214	0.00384	257841	0.000128909	33.2422
111	rs6708515	0.6207	-0.01671	0.00298	257841	0.000121931	31.4425
112	rs6718450	0.4252	0.01698	0.00296	257841	0.00012761	32.907
113	rs6798941	0.2857	0.01794	0.00313	257841	0.000127394	32.8513
114	rs6819372	0.5357	0.01865	0.00286	257841	0.000164893	42.5228
115	rs6860626	0.1412	-0.02149	0.00376	257841	0.000126675	32.6658
116	rs6903716	0.2738	-0.01842	0.00314	257841	0.000133447	34.4125
117	rs6952104	0.5221	0.01864	0.00285	257841	0.000165874	42.7759
118	rs6975134	0.4218	0.02194	0.00291	257841	0.000220414	56.8439
119	rs702222	0.3282	-0.02002	0.00297	257841	0.000176192	45.4372
120	rs7044246	0.6956	0.01748	0.00311	257841	0.000122506	31.5907
121	rs7256776	0.2908	-0.01864	0.00304	257841	0.000145791	37.596
122	rs72739469	0.05442	0.03577	0.00619	257841	0.000129494	33.3928
123	rs72821233	0.2721	-0.0201	0.00323	257841	0.000150165	38.7243
124	rs7312770	0.5136	-0.016	0.00287	257841	0.000120524	31.0794
125	rs73189617	0.3299	0.01854	0.00315	257841	0.000134335	34.6414
126	rs73845427	0.02891	-0.0466	0.00807	257841	0.000129305	33.3443
127	rs73989053	0.1616	-0.02211	0.00381	257841	0.000130593	33.6763
128	rs74370218	0.3827	-0.018	0.00295	257841	0.000144373	37.2304
129	rs7573001	0.415	-0.01647	0.00295	257841	0.000120876	31.1702
130	rs7588384	0.3129	-0.01891	0.00322	257841	0.00013374	34.488
131	rs75973558	0.119	-0.02463	0.00426	257841	0.000129629	33.4277
132	rs7599860	0.2279	0.01967	0.00334	257841	0.000134495	34.6827
133	rs7626560	0.1361	0.02393	0.00389	257841	0.000146747	37.8428
134	rs77128898	0.02211	-0.04626	0.00768	257841	0.000140694	36.2815
135	rs78358737	0.03401	0.04248	0.00687	257841	0.000148265	38.2342
136	rs78382112	0.05782	0.03682	0.00639	257841	0.000128753	33.2019
137	rs7963801	0.5476	-0.02296	0.00292	257841	0.00023973	61.8265
138	rs80170948	0.05272	-0.04589	0.00706	257841	0.000163834	42.2497
139	rs8054299	0.3316	0.02556	0.00306	257841	0.000270526	69.7711
140	rs8058881	0.25	0.01831	0.00334	257841	0.000116542	30.0525
141	rs830383	0.631	-0.01952	0.00295	257841	0.000169781	43.7837
142	rs875361	0.449	-0.01623	0.00287	257841	0.000124013	31.9794
143	rs889169	0.5867	0.01743	0.003	257841	0.000130901	33.7558
144	rs9384679	0.4082	-0.02822	0.00295	257841	0.000354784	91.5096
145	rs9436866	0.09524	0.03309	0.00481	257841	0.000183515	47.326
146	rs991871	0.7551	0.0243	0.00337	257841	0.000201611	51.9935
147	rs9930063	0.4592	0.01633	0.00288	257841	0.000124676	32.1502
